# Supplementary material for: The effect of bile acids on the growth and global gene expression profiles in Akkermansia muciniphila
Source: PubMed Central journal article supplement (PMC7671984; doi:10.1007/s00253-020-10976-3), 2020-11-07
Supplement: 253_2020_10976_MOESM1_ESM.pdf [file 253_2020_10976_MOESM1_ESM.pdf]

Journal: Applied and Microbiology and Biotechnology

Manuscript Title: The effect of bile acids on the growth and global gene expression profiles in *Akkermansia muciniphila*

Author name: Tatsuro Hagi <sup>1,2\*</sup>, Sharon Y. Geerlings <sup>1</sup>, Bart Nijssse <sup>3</sup>, Clara Belzer <sup>1\*</sup>

Affiliation of the authors: <sup>1</sup>Laboratory of Microbiology, Wageningen University and Research, 6708 WE Wageningen, The Netherlands, <sup>2</sup>Animal Products Research Division, Institute of Livestock and Grassland Science, National Agriculture and Food Research Organization (NARO), Ibaraki 305-0901 Japan, <sup>3</sup>Systems and Synthetic Biology, Wageningen University and Research, 6708 WE Wageningen, The Netherlands

The e-mail address and telephone number of the corresponding authors

Clara Belzer: E-mail: clara.belzer@wur.nl, Phone: +31 317 482 795

Tatsuro Hagi: E-mail: thagi@affrc.go.jp, Phone: +81 29 838 8685

**Supplemental Table S1** Significant differential expression of genes under ox-bile condition

| Locus_tag                | log2Fold Change | padj     | ID       | Product                                                                 | Protein_ID     |
|--------------------------|-----------------|----------|----------|-------------------------------------------------------------------------|----------------|
| <b>Upregulated genes</b> |                 |          |          |                                                                         |                |
| AMUC_RS04540             | 5.426           | 0.00106  | gene905  | Hypothetical protein                                                    | WP_042447787.1 |
| AMUC_RS07350             | 1.032           | 3.12E-32 | gene1461 | ABC transporter permease                                                | WP_012420419.1 |
| AMUC_RS04835             | 0.981           | 2.8E-07  | gene964  | Hypothetical protein                                                    | WP_042447818.1 |
| AMUC_RS01985             | 0.938           | 2.64E-60 | gene395  | Hypothetical protein                                                    | WP_012419409.1 |
| AMUC_RS00145             | 0.930           | 0.044701 | gene28   | Hypothetical protein                                                    | WP_042447393.1 |
| AMUC_RS00025             | 0.901           | 2.25E-31 | gene4    | ATP-binding cassette domain-containing protein                          | WP_012419065.1 |
| AMUC_RS07360             | 0.901           | 5.31E-54 | gene1463 | HlyD family efflux transporter periplasmic adaptor subunit              | WP_012420421.1 |
| AMUC_RS00090             | 0.865           | 4.54E-24 | gene17   | Hypothetical protein                                                    | WP_042447385.1 |
| AMUC_RS11530             | 0.838           | 0.040573 | gene2300 | Hypothetical protein                                                    | WP_012421183.1 |
| AMUC_RS02315             | 0.833           | 0.044265 | gene461  | Hypothetical protein                                                    | WP_042447591.1 |
| AMUC_RS09490             | 0.809           | 3.43E-31 | gene1890 | Hypothetical protein                                                    | WP_012420811.1 |
| AMUC_RS03250             | 0.809           | 1.76E-12 | gene648  | Phospholipid/glycerol acyltransferase                                   | WP_012419647.1 |
| AMUC_RS03405             | 0.805           | 2.22E-09 | gene679  | Peptidase M60                                                           | WP_012419679.1 |
| AMUC_RS07355             | 0.793           | 3.1E-37  | gene1462 | ABC transporter ATP-binding protein                                     | WP_012420420.1 |
| AMUC_RS03410             | 0.792           | 0.019798 | gene680  | Hypothetical protein                                                    | WP_042447676.1 |
| AMUC_RS04655             | 0.770           | 2.01E-07 | gene928  | Hypothetical protein                                                    |                |
| AMUC_RS12090             | 0.749           | 2.69E-39 | gene1685 | Prepilin-type N-terminal cleavage/methylation domain-containing protein | WP_012420618.1 |
| AMUC_RS04775             | 0.749           | 7.39E-05 | gene952  | Hypothetical protein                                                    | WP_042447805.1 |
| AMUC_RS02165             | 0.743           | 5.9E-16  | gene431  | Trna pseudouridine synthase A                                           | WP_012419443.1 |
| AMUC_RS04970             | 0.736           | 3.86E-05 | gene992  | Glycosyl hydrolase family 109 protein 2                                 | WP_012419967.1 |
| AMUC_RS07595             | 0.735           | 8.01E-06 | gene1509 | Hypothetical protein                                                    | WP_042448077.1 |
| AMUC_RS07345             | 0.731           | 5.04E-20 | gene1460 | Antibiotic ABC transporter permease                                     | WP_012420418.1 |
| AMUC_RS08910             | 0.729           | 1.17E-13 | gene1774 | Hypothetical protein                                                    | WP_042448215.1 |
| AMUC_RS05455             | 0.707           | 5.4E-13  | gene1087 | Hypothetical protein                                                    | WP_012420058.1 |
| AMUC_RS05825             | 0.690           | 0.019118 | gene1159 | Hypothetical protein                                                    | WP_042447906.1 |
| AMUC_RS07530             | 0.682           | 4.59E-08 | gene1496 | Phosphate/sulfate permease                                              | WP_012420448.1 |
| AMUC_RS09690             | 0.673           | 2.19E-23 | gene1930 | Hypothetical protein                                                    | WP_012420848.1 |
| AMUC_RS10910             | 0.662           | 3.96E-12 | gene2175 | PEP-CTERM domain protein                                                | WP_012421069.1 |
| AMUC_RS10505             | 0.660           | 5.8E-11  | gene2095 | Hypothetical protein                                                    | WP_012420995.1 |
| AMUC_RS07510             | 0.652           | 3.72E-07 | gene1492 | Molecular chaperone dnak                                                | WP_012420444.1 |
| AMUC_RS11765             | 0.648           | 0.000103 | gene410  | Hypothetical protein                                                    | WP_052294421.1 |
| AMUC_RS09570             | 0.629           | 0.010839 | gene1906 | Hypothetical protein                                                    | WP_042448291.1 |
| AMUC_RS07260             | 0.628           | 1.43E-06 | gene1443 | Hypothetical protein                                                    | WP_042448027.1 |
| AMUC_RS02540             | 0.620           | 3.91E-20 | gene506  | PDZ/DHR/GLGF domain-containing protein                                  | WP_012419514.1 |

|              |       |          |          |                                                    |                |
|--------------|-------|----------|----------|----------------------------------------------------|----------------|
| AMUC_RS06360 | 0.616 | 9.94E-10 | gene1266 | Holliday junction DNA helicase                     | WP_012420231.1 |
| AMUC_RS00050 | 0.597 | 1.24E-17 | gene9    | Pseudouridine synthase                             | WP_012419070.1 |
| AMUC_RS01000 | 0.594 | 5.33E-17 | gene198  | Hypothetical protein                               | WP_012419233.1 |
| AMUC_RS10890 | 0.589 | 5.84E-21 | gene2171 | Efflux RND transporter periplasmic adaptor subunit | WP_051729712.1 |
| AMUC_RS10150 | 0.584 | 8.17E-09 | gene2025 | Metallophosphoesterase                             | WP_012420929.1 |
| AMUC_RS08510 | 0.578 | 2.22E-09 | gene1694 | Superoxide dismutase                               | WP_012420627.1 |
| AMUC_RS06840 | 0.564 | 5.21E-05 | gene1360 | Hypothetical protein                               | WP_012420316.1 |
| AMUC_RS06225 | 0.552 | 1.38E-09 | gene1239 | Hypothetical protein                               | WP_052294457.1 |
| AMUC_RS06000 | 0.551 | 1.28E-24 | gene1194 | Hypothetical protein                               | WP_012420162.1 |
| AMUC_RS04810 | 0.551 | 0.000522 | gene959  | Mexx family efflux pump subunit                    | WP_012419937.1 |
| AMUC_RS01965 | 0.549 | 3.2E-17  | gene391  | 1,4-dihydroxy-2-naphthoyl-CoA synthase             | WP_012419405.1 |
| AMUC_RS05335 | 0.545 | 1.75E-13 | gene1064 | Hypothetical protein                               | WP_012420036.1 |
| AMUC_RS01130 | 0.542 | 3.51E-06 | gene223  | Methylmalonyl-coa epimerase                        | WP_012419259.1 |
| AMUC_RS00540 | 0.535 | 0.006843 | gene108  | Hypothetical protein                               | WP_042447447.1 |
| AMUC_RS09120 | 0.531 | 0.044527 | gene1816 | Hypothetical protein                               | WP_012420741.1 |
| AMUC_RS04685 | 0.528 | 0.000297 | gene934  | Rubryerythrin                                      | WP_012419913.1 |
| AMUC_RS10850 | 0.527 | 1.96E-08 | gene2163 | Pyruvate carboxyltransferase                       | WP_012421058.1 |
| AMUC_RS10115 | 0.524 | 0.001242 | gene2018 | Hypothetical protein                               | WP_042448335.1 |
| AMUC_RS11960 | 0.519 | 4.89E-08 | gene1079 | Hypothetical protein                               | WP_052294452.1 |
| AMUC_RS00080 | 0.519 | 7.96E-05 | gene15   | DEAD/DEAH box helicase                             | WP_012419077.1 |
| AMUC_RS11150 | 0.517 | 1.37E-15 | gene2224 | Group 1 glycosyl transferase                       | WP_012421112.1 |
| AMUC_RS00100 | 0.514 | 0.003123 | gene19   | Hypothetical protein                               | WP_012419080.1 |
| AMUC_RS09520 | 0.514 | 1.88E-07 | gene1896 | Hypothetical protein                               | WP_012420817.1 |
| AMUC_RS09040 | 0.511 | 7.73E-15 | gene1800 | 2-oxoglutarate dehydrogenase subunit E1            | WP_012420726.1 |
| AMUC_RS09485 | 0.509 | 4.9E-11  | gene1889 | VWA domain-containing protein                      | WP_012420810.1 |
| AMUC_RS04170 | 0.506 | 0.006872 | gene832  | Acyltransferase                                    | WP_012419823.1 |
| AMUC_RS00725 | 0.506 | 0.005835 | gene145  | G-D-S-L family lipolytic protein                   | WP_012419184.1 |
| AMUC_RS05685 | 0.496 | 2.96E-06 | gene1133 | Hypothetical protein                               | WP_042447882.1 |
| AMUC_RS10895 | 0.495 | 1.1E-16  | gene2172 | Efflux RND transporter permease subunit            | WP_012421066.1 |
| AMUC_RS10930 | 0.493 | 5.1E-11  | gene2179 | Chloride channel protein                           | WP_012421073.1 |
| AMUC_RS11025 | 0.493 | 0.00021  | gene2198 | Membrane protein                                   | WP_012421089.1 |
| AMUC_RS07000 | 0.492 | 1.02E-06 | gene1392 | Galactose mutarotase                               | WP_012420348.1 |
| AMUC_RS02265 | 0.486 | 1.68E-08 | gene451  | Hypothetical protein                               | WP_012419463.1 |
| AMUC_RS09190 | 0.485 | 1.27E-11 | gene1830 | Exodeoxyribonuclease VII large subunit             | WP_012420752.1 |
| AMUC_RS01925 | 0.485 | 2.63E-06 | gene383  | DNA polymerase III subunit epsilon                 | WP_012419399.1 |
| AMUC_RS07990 | 0.482 | 0.000377 | gene1589 | Hypothetical protein                               | WP_012420529.1 |
| AMUC_RS06395 | 0.477 | 0.000109 | gene1273 | Cobalt ABC transporter ATP-binding protein         | WP_012420238.1 |
| AMUC_RS11940 | 0.475 | 1E-18    | gene1019 | Biotin/lipoyl attachment domain-containing protein | WP_012419994.1 |
| AMUC_RS05835 | 0.475 | 3.83E-06 | gene1161 | Hypothetical protein                               | WP_012420127.1 |
| AMUC_RS01610 | 0.475 | 1.21E-05 | gene319  | Hypothetical protein                               | WP_012419340.1 |

|              |       |          |          |                                                                   |                |
|--------------|-------|----------|----------|-------------------------------------------------------------------|----------------|
| AMUC_RS10700 | 0.474 | 0.00372  | gene2134 | Integrase                                                         | WP_012421030.1 |
| AMUC_RS02620 | 0.474 | 9.63E-15 | gene522  | Hypothetical protein                                              | WP_022198495.1 |
| AMUC_RS08905 | 0.474 | 0.007079 | gene1773 | Beta-N-acetylhexosaminidase                                       | WP_012420702.1 |
| AMUC_RS04570 | 0.472 | 0.002325 | gene911  | Hypothetical protein                                              | WP_042447790.1 |
| AMUC_RS11905 | 0.471 | 2.67E-07 | gene958  | Merr family transcriptional regulator                             | WP_012419936.1 |
| AMUC_RS09180 | 0.469 | 0.003324 | gene1828 | Hypothetical protein                                              | WP_042448250.1 |
| AMUC_RS06830 | 0.466 | 0.000259 | gene1358 | Hypothetical protein                                              | WP_012420314.1 |
| AMUC_RS02030 | 0.465 | 1.44E-08 | gene404  | Short-chain dehydrogenase/reductase SDR                           | WP_012419417.1 |
| AMUC_RS02950 | 0.465 | 7.76E-08 | gene588  | Hypothetical protein                                              | WP_052294428.1 |
| AMUC_RS03840 | 0.464 | 4.5E-06  | gene765  | Hypothetical protein                                              | WP_012419758.1 |
| AMUC_RS10260 | 0.458 | 4.9E-06  | gene2047 | Hypothetical protein                                              | WP_012420950.1 |
| AMUC_RS10145 | 0.458 | 0.04025  | gene2024 | Hypothetical protein                                              | WP_012420928.1 |
| AMUC_RS06125 | 0.456 | 0.000308 | gene1219 | Hypothetical protein                                              | WP_012420187.1 |
| AMUC_RS09720 | 0.455 | 8.39E-09 | gene1936 | SAM-dependent methyltransferase                                   | WP_012420853.1 |
| AMUC_RS07040 | 0.453 | 3.8E-10  | gene1400 | Hypothetical protein                                              | WP_042448011.1 |
| AMUC_RS01305 | 0.449 | 2.42E-13 | gene258  | Peptide deformylase                                               | WP_012419290.1 |
| AMUC_RS01400 | 0.448 | 0.025297 | gene277  | Hypothetical protein                                              | WP_012419308.1 |
| AMUC_RS06995 | 0.447 | 5.62E-05 | gene1391 | Hypothetical protein                                              | WP_042448007.1 |
| AMUC_RS03380 | 0.446 | 0.048395 | gene674  | PEP-CTERM domain protein                                          | WP_012419674.1 |
| AMUC_RS08895 | 0.444 | 0.030279 | gene1771 | Glycoside hydrolase family 2                                      | WP_012420700.1 |
| AMUC_RS10935 | 0.443 | 0.017016 | gene2180 | Hypothetical protein                                              | WP_042448409.1 |
| AMUC_RS12145 | 0.436 | 0.041772 | gene1958 | Hypothetical protein                                              | WP_031931303.1 |
| AMUC_RS10165 | 0.436 | 6.82E-13 | gene2028 | Hypothetical protein                                              | WP_042448337.1 |
| AMUC_RS04120 | 0.434 | 5.9E-11  | gene821  | Hypothetical protein                                              | WP_042447749.1 |
| AMUC_RS03360 | 0.434 | 0.000918 | gene670  | Hypothetical protein                                              | WP_012419669.1 |
| AMUC_RS09770 | 0.432 | 5.83E-13 | gene1946 | Class II aldolase/adducin family protein                          | WP_012420861.1 |
| AMUC_RS03010 | 0.432 | 0.006901 | gene600  | Hypothetical protein                                              | WP_042447636.1 |
| AMUC_RS06825 | 0.427 | 0.001518 | gene1357 | Hypothetical protein                                              | WP_042447999.1 |
| AMUC_RS12210 | 0.425 | 1.75E-09 | gene2178 | PTS transporter subunit IIA-like nitrogen-regulatory protein ptsn | WP_012421072.1 |
| AMUC_RS03345 | 0.418 | 4.34E-07 | gene667  | Hypothetical protein                                              | WP_042447669.1 |
| AMUC_RS02450 | 0.417 | 1.48E-09 | gene488  | Hypothetical protein                                              | WP_051729260.1 |
| AMUC_RS11145 | 0.417 | 0.003834 | gene2223 | Glycosyl transferase family 1                                     | WP_012421111.1 |
| AMUC_RS06905 | 0.415 | 0.009792 | gene1373 | Hypothetical protein                                              | WP_052294463.1 |
| AMUC_RS11430 | 0.413 | 6.18E-08 | gene2280 | Hypothetical protein                                              | WP_012421164.1 |
| AMUC_RS02835 | 0.412 | 0.000106 | gene565  | Hypothetical protein                                              | WP_052294427.1 |
| AMUC_RS04595 | 0.410 | 4.21E-08 | gene916  | Hypothetical protein                                              | WP_012419896.1 |
| AMUC_RS07860 | 0.410 | 1.38E-10 | gene1563 | Hypothetical protein                                              | WP_012420504.1 |
| AMUC_RS12170 | 0.409 | 2.55E-12 | gene1998 | Hypothetical protein                                              | WP_012420904.1 |
| AMUC_RS08165 | 0.409 | 6.8E-16  | gene1625 | Glyceraldehyde 3-phosphate reductase                              | WP_012420563.1 |
| AMUC_RS08625 | 0.405 | 2.16E-09 | gene1717 | Polysaccharide deacetylase                                        | WP_012420651.1 |
| AMUC_RS07105 | 0.404 | 6.77E-07 | gene1413 | DNA polymerase IV                                                 | WP_012420369.1 |

|              |       |          |          |                                                                         |                |
|--------------|-------|----------|----------|-------------------------------------------------------------------------|----------------|
| AMUC_RS10905 | 0.402 | 0.003577 | gene2174 | PEP-CTERM sorting domain-containing protein                             | WP_012421068.1 |
| AMUC_RS10460 | 0.402 | 0.000323 | gene2087 | PA14 domain-containing protein                                          | WP_012420987.1 |
| AMUC_RS07920 | 0.401 | 0.010281 | gene1575 | Hypothetical protein                                                    | WP_012420515.1 |
| AMUC_RS01650 | 0.401 | 0.013286 | gene327  | Hypothetical protein                                                    | WP_042447545.1 |
| AMUC_RS10745 | 0.397 | 1.22E-10 | gene2143 | Hydroxyethylthiazole kinase                                             | WP_012421040.1 |
| AMUC_RS10900 | 0.396 | 5.46E-11 | gene2173 | Efflux transporter outer membrane subunit                               |                |
| AMUC_RS04815 | 0.393 | 0.000726 | gene960  | Multidrug efflux RND transporter permease subunit                       | WP_012419938.1 |
| AMUC_RS11515 | 0.393 | 2.47E-11 | gene2297 | Hypothetical protein                                                    | WP_012421180.1 |
| AMUC_RS11850 | 0.393 | 1.89E-09 | gene802  | Prepilin-type N-terminal cleavage/methylation domain-containing protein | WP_012419796.1 |
| AMUC_RS09115 | 0.393 | 0.037731 | gene1815 | Nucleotide pyrophosphatase                                              | WP_042448241.1 |
| AMUC_RS05305 | 0.389 | 0.001941 | gene1059 | Hypothetical protein                                                    | WP_051729438.1 |
| AMUC_RS03300 | 0.383 | 0.017407 | gene658  | Hypothetical protein                                                    | WP_042447666.1 |
| AMUC_RS11385 | 0.383 | 6.6E-11  | gene2271 | Hypothetical protein                                                    | WP_042448466.1 |
| AMUC_RS09765 | 0.382 | 0.01556  | gene1945 | Hypothetical protein                                                    | WP_031931297.1 |
| AMUC_RS03640 | 0.381 | 1.43E-09 | gene725  | Trypsin-like protein serine protease                                    | WP_012419722.1 |
| AMUC_RS04975 | 0.380 | 3.96E-06 | gene993  | Non-specific serine/threonine protein kinase                            | WP_012419968.1 |
| AMUC_RS02860 | 0.375 | 2.22E-09 | gene570  | UBA/THIF-type NAD/FAD binding protein                                   | WP_012419575.1 |
| AMUC_RS03165 | 0.373 | 1.09E-06 | gene631  | Hypothetical protein                                                    | WP_012419629.1 |
| AMUC_RS00805 | 0.373 | 0.026264 | gene160  | Hypothetical protein                                                    | WP_012419197.1 |
| AMUC_RS12255 | 0.371 | 0.001004 | gene2312 | Chloramphenicol phosphotransferase                                      | WP_012421196.1 |
| AMUC_RS09050 | 0.369 | 4.84E-07 | gene1802 | Cytochrome d ubiquinol oxidase subunit I                                | WP_012420728.1 |
| AMUC_RS02840 | 0.368 | 0.005247 | gene566  | Hypothetical protein                                                    | WP_012419571.1 |
| AMUC_RS09495 | 0.367 | 7.3E-09  | gene1891 | Hypothetical protein                                                    | WP_012420812.1 |
| AMUC_RS07640 | 0.363 | 1.2E-08  | gene1519 | Phosphate acetyltransferase                                             | WP_012420465.1 |
| AMUC_RS10740 | 0.363 | 1.16E-06 | gene2142 | Thiamine phosphate synthase                                             | WP_012421039.1 |
| AMUC_RS04405 | 0.361 | 7.13E-06 | gene878  | Hypothetical protein                                                    | WP_012419865.1 |
| AMUC_RS11915 | 0.359 | 1.21E-05 | gene968  | Hypothetical protein                                                    | WP_052294446.1 |
| AMUC_RS00610 | 0.358 | 1.97E-05 | gene122  | Hypothetical protein                                                    | WP_012419164.1 |
| AMUC_RS04980 | 0.354 | 6.42E-07 | gene994  | Bifunctional metallophosphatase/5'-nucleotidase                         | WP_012419969.1 |
| AMUC_RS09065 | 0.354 | 0.000176 | gene1805 | Hypothetical protein                                                    | WP_012420731.1 |
| AMUC_RS07730 | 0.351 | 1.47E-12 | gene1537 | Hypothetical protein                                                    | WP_012420480.1 |
| AMUC_RS08860 | 0.348 | 1.8E-06  | gene1764 | Hypothetical protein                                                    | WP_042448209.1 |
| AMUC_RS11505 | 0.348 | 3.24E-11 | gene2295 | NADH-quinone oxidoreductase subunit B                                   | WP_012421178.1 |
| AMUC_RS10270 | 0.346 | 0.001495 | gene2049 | Hypothetical protein                                                    | WP_012420952.1 |
| AMUC_RS06340 | 0.345 | 2.03E-06 | gene1262 | Hypothetical protein                                                    | WP_012420228.1 |
| AMUC_RS06810 | 0.343 | 0.005558 | gene1354 | Hypothetical protein                                                    | WP_012420310.1 |
| AMUC_RS04115 | 0.342 | 0.006873 | gene820  | Hypothetical protein                                                    | WP_012419814.1 |

|              |       |          |          |                                           |                |
|--------------|-------|----------|----------|-------------------------------------------|----------------|
| AMUC_RS03020 | 0.341 | 1.41E-08 | gene602  | Phage SPO1 DNA polymerase-related protein | WP_012419604.1 |
| AMUC_RS11720 | 0.336 | 8.42E-06 | gene228  | Biotin--[acetyl-coa-carboxylase] ligase   | WP_012419264.1 |
| AMUC_RS08500 | 0.336 | 3.51E-08 | gene1692 | Lipid II flippase murj                    | WP_012420625.1 |
| AMUC_RS07655 | 0.334 | 0.000198 | gene1522 | Hypothetical protein                      | WP_012420468.1 |
| AMUC_RS03365 | 0.333 | 0.003405 | gene671  | Type 11 methyltransferase                 | WP_012419670.1 |
| AMUC_RS02445 | 0.333 | 2.27E-06 | gene487  | DNA protecting protein dpra               | WP_012419496.1 |
| AMUC_RS08610 | 0.332 | 0.00198  | gene1714 | NADH dehydrogenase (ubiquinone)           | WP_012420648.1 |
| AMUC_RS07785 | 0.332 | 2.65E-12 | gene1548 | Excinuclease ABC subunit A                | WP_012420489.1 |
| AMUC_RS09295 | 0.330 | 2.54E-05 | gene1851 | Hypothetical protein                      | WP_012420772.1 |
| AMUC_RS04165 | 0.330 | 3.83E-05 | gene831  | 2-hydroxyacid dehydrogenase               | WP_031930511.1 |
| AMUC_RS09705 | 0.328 | 0.000269 | gene1933 | Hypothetical protein                      | WP_042448315.1 |
| AMUC_RS06505 | 0.328 | 0.007528 | gene1294 | Hypothetical protein                      | WP_012420259.1 |
| AMUC_RS05320 | 0.328 | 0.000436 | gene1062 | PEP-CTERM domain protein                  | WP_012420034.1 |
| AMUC_RS00085 | 0.328 | 1.65E-06 | gene16   | Hypothetical protein                      | WP_012419078.1 |
| AMUC_RS11310 | 0.327 | 5.43E-09 | gene2256 | ATPase AAA                                | WP_012421142.1 |
| AMUC_RS09575 | 0.327 | 0.000425 | gene1907 | Hypothetical protein                      | WP_042448293.1 |
| AMUC_RS02135 | 0.325 | 0.008998 | gene425  | 30S ribosomal protein S15                 | WP_012419437.1 |
| AMUC_RS09045 | 0.325 | 1.88E-07 | gene1801 | Cytochrome D oxidase subunit I            | WP_012420727.1 |
| AMUC_RS10455 | 0.322 | 0.004392 | gene2086 | Hypothetical protein                      | WP_012420986.1 |
| AMUC_RS11445 | 0.322 | 0.011436 | gene2283 | Hypothetical protein                      | WP_012421167.1 |
| AMUC_RS06400 | 0.321 | 0.006716 | gene1274 | Cobalt ECF transporter T component cbiq   | WP_012420239.1 |
| AMUC_RS11570 | 0.320 | 0.001543 | gene2308 | Hypothetical protein                      | WP_012421192.1 |
| AMUC_RS11315 | 0.320 | 1.68E-09 | gene2257 | Hypothetical protein                      | WP_012421143.1 |
| AMUC_RS09795 | 0.318 | 3.36E-06 | gene1951 | Hypothetical protein                      | WP_012420866.1 |
| AMUC_RS11875 | 0.318 | 0.000863 | gene863  | Hypothetical protein                      | WP_052294439.1 |
| AMUC_RS06215 | 0.316 | 1.31E-05 | gene1237 | VWA domain-containing protein             | WP_012420204.1 |
| AMUC_RS11860 | 0.315 | 6.62E-05 | gene814  | Family 2 glycosyl transferase             | WP_012419808.1 |
| AMUC_RS00485 | 0.313 | 0.010512 | gene97   | Hypothetical protein                      | WP_012419141.1 |
| AMUC_RS01110 | 0.313 | 7.06E-09 | gene219  | Serine/threonine protein kinase           | WP_012419255.1 |
| AMUC_RS09230 | 0.313 | 1.48E-06 | gene1838 | Two-component sensor histidine kinase     | WP_012420759.1 |
| AMUC_RS10645 | 0.312 | 2.79E-08 | gene2123 | Tryptophanase                             | WP_012421020.1 |
| AMUC_RS00945 | 0.311 | 0.000884 | gene187  | Hypothetical protein                      | WP_012419223.1 |
| AMUC_RS11450 | 0.311 | 4.03E-05 | gene2284 | 6-pyruvoyltetrahydropterin synthase       | WP_012421168.1 |
| AMUC_RS08395 | 0.310 | 0.002376 | gene1671 | Hypothetical protein                      | WP_042448177.1 |
| AMUC_RS01765 | 0.307 | 4.24E-05 | gene350  | Signal transduction histidine kinase      | WP_012419368.1 |
| AMUC_RS03960 | 0.306 | 1.78E-05 | gene789  | Hypothetical protein                      | WP_012419782.1 |
| AMUC_RS09855 | 0.304 | 3.84E-11 | gene1964 | PDZ/DHR/GLGF domain-containing protein    | WP_012420875.1 |
| AMUC_RS11810 | 0.303 | 0.000215 | gene614  | Hypothetical protein                      | WP_052294431.1 |
| AMUC_RS05715 | 0.303 | 6E-06    | gene1139 | Transcriptional regulator                 | WP_012420108.1 |
| AMUC_RS01070 | 0.302 | 0.012885 | gene211  | Peptidase M28                             | WP_012419246.1 |
| AMUC_RS03500 | 0.301 | 0.00154  | gene697  | tRNA dimethylallyl transferase            | WP_012419694.1 |

|              |       |          |          |                                                                      |                |
|--------------|-------|----------|----------|----------------------------------------------------------------------|----------------|
| AMUC_RS00960 | 0.300 | 1.11E-05 | gene190  | Peptidyl-prolyl cis-trans isomerase                                  | WP_012419226.1 |
| AMUC_RS08115 | 0.300 | 2.7E-05  | gene1614 | Signal transduction histidine kinase                                 | WP_012420552.1 |
| AMUC_RS08375 | 0.299 | 3.46E-08 | gene1667 | Alpha-2-macroglobulin domain-containing protein                      | WP_012420601.1 |
| AMUC_RS01410 | 0.298 | 0.00585  | gene279  | Hypothetical protein                                                 | WP_012419310.1 |
| AMUC_RS06265 | 0.298 | 0.024896 | gene1247 | Hypothetical protein                                                 | WP_012420214.1 |
| AMUC_RS08980 | 0.298 | 0.001    | gene1788 | Cobalamin biosynthesis protein CobD                                  | WP_012420715.1 |
| AMUC_RS02250 | 0.297 | 6.95E-05 | gene448  | ABC transporter permease                                             | WP_012419460.1 |
| AMUC_RS11560 | 0.296 | 2.03E-05 | gene2306 | Hypothetical protein                                                 | WP_012421189.1 |
| AMUC_RS09685 | 0.295 | 0.007949 | gene1929 | Hypothetical protein                                                 | WP_042448310.1 |
| AMUC_RS08520 | 0.295 | 1.19E-05 | gene1696 | NCAIR mutase-like protein                                            | WP_012420629.1 |
| AMUC_RS02435 | 0.293 | 0.000299 | gene485  | Hypothetical protein                                                 | WP_051729257.1 |
| AMUC_RS11800 | 0.293 | 7.82E-06 | gene599  | Hypothetical protein                                                 | WP_031930332.1 |
| AMUC_RS06175 | 0.292 | 0.00979  | gene1229 | Hypothetical protein                                                 | WP_012420197.1 |
| AMUC_RS03805 | 0.291 | 3.7E-06  | gene758  | Hypothetical protein                                                 | WP_052294496.1 |
| AMUC_RS02625 | 0.291 | 2.68E-09 | gene523  | Hypothetical protein                                                 | WP_012419531.1 |
| AMUC_RS10195 | 0.288 | 1.41E-07 | gene2034 | Hypothetical protein                                                 | WP_012420938.1 |
| AMUC_RS03255 | 0.287 | 1.59E-05 | gene649  | DNA recombination protein recF                                       | WP_012419648.1 |
| AMUC_RS07100 | 0.287 | 0.001598 | gene1412 | Methionine sulfoxide reductase B                                     | WP_012420368.1 |
| AMUC_RS06220 | 0.287 | 0.002375 | gene1238 | Hypothetical protein                                                 | WP_012420205.1 |
| AMUC_RS03305 | 0.286 | 0.048749 | gene659  | Hypothetical protein                                                 | WP_052294433.1 |
| AMUC_RS12130 | 0.282 | 0.003827 | gene1879 | Hypothetical protein                                                 | WP_012420800.1 |
| AMUC_RS07410 | 0.282 | 0.031557 | gene1473 | Hypothetical protein                                                 | WP_012420430.1 |
| AMUC_RS03600 | 0.280 | 0.000112 | gene717  | Polypeptide-transport-associated domain-containing protein FtsQ-type | WP_012419714.1 |
| AMUC_RS00690 | 0.280 | 1.02E-05 | gene138  | Hypothetical protein                                                 | WP_012419179.1 |
| AMUC_RS06115 | 0.279 | 0.001139 | gene1217 | Hypothetical protein                                                 | WP_012420186.1 |
| AMUC_RS08355 | 0.278 | 1.16E-05 | gene1663 | ATP-dependent nuclease subunit B-like protein                        | WP_012420598.1 |
| AMUC_RS04985 | 0.277 | 0.002721 | gene995  | Hypothetical protein                                                 | WP_051729401.1 |
| AMUC_RS02650 | 0.277 | 0.001542 | gene528  | Alpha/beta superfamily hydrolase                                     | WP_012419535.1 |
| AMUC_RS00185 | 0.276 | 0.000215 | gene36   | Proline--tRNA ligase                                                 | WP_012419096.1 |
| AMUC_RS03175 | 0.276 | 0.003548 | gene633  | Hypothetical protein                                                 | WP_042447658.1 |
| AMUC_RS12075 | 0.276 | 0.013249 | gene1579 | Hypothetical protein                                                 | WP_012420519.1 |
| AMUC_RS03580 | 0.275 | 3.1E-07  | gene713  | Cell cycle protein                                                   | WP_012419710.1 |
| AMUC_RS07790 | 0.272 | 0.006316 | gene1549 | Hypothetical protein                                                 | WP_042448097.1 |
| AMUC_RS11040 | 0.271 | 3.04E-05 | gene2201 | Hypothetical protein                                                 | WP_012421091.1 |
| AMUC_RS00695 | 0.270 | 1.49E-05 | gene139  | AI-2E family transporter                                             | WP_012419180.1 |
| AMUC_RS06010 | 0.270 | 2.1E-08  | gene1196 | Terpene cyclase/mutase family protein                                | WP_012420164.1 |
| AMUC_RS08160 | 0.269 | 2.14E-07 | gene1624 | Lipoate-protein ligase A-like protein                                | WP_012420562.1 |
| AMUC_RS00325 | 0.268 | 0.000209 | gene65   | Zinc transporter                                                     | WP_012419116.1 |
| AMUC_RS00955 | 0.268 | 0.002805 | gene189  | Twitching motility protein PilT                                      | WP_012419225.1 |
| AMUC_RS11365 | 0.268 | 6.6E-06  | gene2267 | Hydrogenase 2 large subunit                                          | WP_012421152.1 |

|              |       |          |          |                                                   |                |
|--------------|-------|----------|----------|---------------------------------------------------|----------------|
| AMUC_RS03880 | 0.268 | 6.56E-08 | gene773  | Hypothetical protein                              | WP_012419766.1 |
| AMUC_RS04840 | 0.267 | 3.34E-05 | gene965  | Membrane protein                                  | WP_012419942.1 |
| AMUC_RS09500 | 0.267 | 2.68E-06 | gene1892 | ATPase AAA                                        | WP_012420813.1 |
| AMUC_RS02970 | 0.266 | 0.003637 | gene592  | Hypothetical protein                              | WP_012419596.1 |
| AMUC_RS11660 | 0.266 | 0.002513 | gene115  | Hypothetical protein                              | WP_052294408.1 |
| AMUC_RS04900 | 0.265 | 0.027613 | gene977  | Hypothetical protein                              | WP_012419954.1 |
| AMUC_RS06495 | 0.263 | 1.1E-05  | gene1292 | Hypothetical protein                              | WP_042447972.1 |
| AMUC_RS10265 | 0.262 | 3.06E-05 | gene2048 | Beta-N-acetylhexosaminidase                       | WP_012420951.1 |
| AMUC_RS01225 | 0.262 | 0.00098  | gene242  | Acriflavin resistance protein                     | WP_012419278.1 |
| AMUC_RS01895 | 0.262 | 0.00021  | gene377  | Phospholipid/glycerol acyltransferase             | WP_012419393.1 |
| AMUC_RS06405 | 0.262 | 8.44E-06 | gene1275 | Cobalamin biosynthesis protein CbiM               | WP_012420240.1 |
| AMUC_RS10040 | 0.262 | 0.012753 | gene2002 | Hypothetical protein                              | WP_012420909.1 |
| AMUC_RS08275 | 0.261 | 0.020066 | gene1647 | Hypothetical protein                              | WP_042448157.1 |
| AMUC_RS01150 | 0.261 | 0.018565 | gene227  | Glutaconyl-coa decarboxylase subunit beta         |                |
| AMUC_RS06015 | 0.260 | 6.75E-08 | gene1197 | Terpene cyclase/mutase family protein             | WP_012420165.1 |
| AMUC_RS01505 | 0.260 | 0.003954 | gene298  | rRNA maturation RNase YbeY                        | WP_052294414.1 |
| AMUC_RS00520 | 0.260 | 0.001754 | gene104  | DNA mismatch repair protein MutL                  | WP_012419146.1 |
| AMUC_RS11360 | 0.260 | 2.42E-06 | gene2266 | Ni/Fe hydrogenase                                 | WP_012421151.1 |
| AMUC_RS05650 | 0.260 | 9.58E-07 | gene1126 | Methylenetetrahydrofolate reductase [NAD(P)H]     | WP_012420096.1 |
| AMUC_RS00950 | 0.260 | 5.17E-07 | gene188  | Twitching motility protein PilT                   | WP_012419224.1 |
| AMUC_RS03340 | 0.259 | 0.01087  | gene666  | DNA-deoxyinosine glycosylase                      | WP_012419665.1 |
| AMUC_RS08745 | 0.258 | 1.7E-06  | gene1741 | Hypothetical protein                              | WP_052294476.1 |
| AMUC_RS05120 | 0.258 | 0.000128 | gene1022 | Hypothetical protein                              | WP_012419997.1 |
| AMUC_RS00790 | 0.258 | 4.7E-07  | gene157  | Hypothetical protein                              | WP_012419194.1 |
| AMUC_RS07915 | 0.257 | 8.6E-05  | gene1574 | 4-hydroxythreonine-4-phosphate dehydrogenase PdxA | WP_012420514.1 |
| AMUC_RS05280 | 0.255 | 1.46E-05 | gene1054 | Sugar-binding protein                             | WP_012420027.1 |
| AMUC_RS09370 | 0.255 | 8.8E-06  | gene1866 | Sulfatase                                         | WP_012420787.1 |
| AMUC_RS01335 | 0.255 | 1.05E-05 | gene264  | MBL fold hydrolase                                | WP_012419296.1 |
| AMUC_RS06045 | 0.255 | 0.006106 | gene1203 | MATE family efflux transporter                    | WP_012420172.1 |
| AMUC_RS11355 | 0.252 | 0.015782 | gene2265 | Carbohydrate porin                                | WP_012421150.1 |
| AMUC_RS11935 | 0.252 | 0.001924 | gene1017 | Family 2 glycosyl transferase                     | WP_012419992.1 |
| AMUC_RS01220 | 0.252 | 0.000584 | gene241  | RND family efflux transporter MFP subunit         | WP_012419277.1 |
| AMUC_RS04780 | 0.251 | 0.000137 | gene953  | Hypothetical protein                              | WP_012419932.1 |
| AMUC_RS08440 | 0.250 | 0.017267 | gene1680 | Pseudouridine synthase                            | WP_012420613.1 |
| AMUC_RS08495 | 0.250 | 0.000127 | gene1691 | Aspartate aminotransferase                        | WP_012420624.1 |
| AMUC_RS00970 | 0.247 | 0.004085 | gene192  | Hypothetical protein                              | WP_012419227.1 |
| AMUC_RS00905 | 0.247 | 0.000334 | gene179  | ABC transporter                                   | WP_012419215.1 |
| AMUC_RS08460 | 0.245 | 0.000201 | gene1684 | Glycosyl transferase family 2                     | WP_012420617.1 |
| AMUC_RS09275 | 0.243 | 0.004536 | gene1847 | Hypothetical protein                              | WP_012420768.1 |



|              |       |          |          |                                                           |                |
|--------------|-------|----------|----------|-----------------------------------------------------------|----------------|
| AMUC_RS08350 | 0.242 | 1.02E-05 | gene1662 | UvrD/REP helicase                                         | WP_012420597.1 |
| AMUC_RS05975 | 0.242 | 0.000686 | gene1189 | Uracil-DNA glycosylase                                    | WP_012420157.1 |
| AMUC_RS11740 | 0.240 | 0.005764 | gene368  | Hypothetical protein                                      | WP_012419385.1 |
| AMUC_RS12015 | 0.240 | 2.63E-06 | gene1325 | N-acetylmuramoyl-L-alanine amidase                        | WP_012420284.1 |
| AMUC_RS10565 | 0.239 | 5.93E-06 | gene2107 | Hypothetical protein                                      | WP_012421004.1 |
| AMUC_RS03610 | 0.238 | 0.000537 | gene719  | Cell wall hydrolase/autolysin                             | WP_012419716.1 |
| AMUC_RS00615 | 0.237 | 0.002286 | gene123  | RND transporter NodT                                      | WP_012419165.1 |
| AMUC_RS08035 | 0.237 | 0.001791 | gene1598 | Polysaccharide deacetylase                                | WP_012420537.1 |
| AMUC_RS09925 | 0.237 | 0.011485 | gene1979 | Hypothetical protein                                      | WP_012420885.1 |
| AMUC_RS08020 | 0.236 | 5.73E-05 | gene1595 | Hypothetical protein                                      | WP_012420534.1 |
| AMUC_RS10845 | 0.235 | 0.004656 | gene2162 | Cardiolipin synthase                                      | WP_052294493.1 |
| AMUC_RS01210 | 0.235 | 0.003483 | gene239  | Hypothetical protein                                      | WP_012419275.1 |
| AMUC_RS03800 | 0.235 | 0.003773 | gene757  | Hypothetical protein                                      | WP_012419752.1 |
| AMUC_RS06210 | 0.233 | 0.013164 | gene1236 | Hypothetical protein                                      | WP_042447945.1 |
| AMUC_RS02995 | 0.232 | 1.36E-07 | gene597  | MotA/TolQ/ExbB proton channel                             | WP_012419601.1 |
| AMUC_RS11780 | 0.231 | 0.000193 | gene468  | Transcription antitermination factor NusB                 | WP_012419477.1 |
| AMUC_RS07875 | 0.231 | 0.010441 | gene1566 | Exosortase                                                | WP_042448118.1 |
| AMUC_RS09185 | 0.229 | 0.002142 | gene1829 | Hypothetical protein                                      | WP_042448252.1 |
| AMUC_RS05170 | 0.228 | 0.000226 | gene1032 | Tat (twin-arginine translocation) pathway signal sequence | WP_042448853.1 |
| AMUC_RS11215 | 0.228 | 0.000106 | gene2237 | Cystathionine beta-lyase                                  | WP_012421125.1 |
| AMUC_RS03965 | 0.228 | 0.026884 | gene790  | Hypothetical protein                                      | WP_042447734.1 |
| AMUC_RS06245 | 0.226 | 0.00111  | gene1243 | ATPase AAA                                                | WP_042448944.1 |
| AMUC_RS10385 | 0.226 | 0.000197 | gene2072 | Hypothetical protein                                      | WP_012420972.1 |
| AMUC_RS08515 | 0.226 | 0.000129 | gene1695 | Hypothetical protein                                      | WP_012420628.1 |
| AMUC_RS08095 | 0.224 | 0.002023 | gene1610 | OmpA/MotB domain-containing protein                       | WP_012420548.1 |
| AMUC_RS11680 | 0.223 | 1.2E-08  | gene146  | Hypothetical protein                                      | WP_052294412.1 |
| AMUC_RS03755 | 0.223 | 0.002399 | gene748  | Thiol reductase thioredoxin                               | WP_012419743.1 |
| AMUC_RS08400 | 0.222 | 0.002553 | gene1672 | Hypothetical protein                                      | WP_012420605.1 |
| AMUC_RS11165 | 0.221 | 0.038533 | gene2227 | Transferase                                               | WP_012421115.1 |
| AMUC_RS04990 | 0.221 | 6.67E-05 | gene996  | ATP-NAD/acox kinase                                       | WP_012419971.1 |
| AMUC_RS11995 | 0.220 | 4.76E-05 | gene1195 | Hypothetical protein                                      | WP_052294455.1 |
| AMUC_RS08000 | 0.217 | 0.008986 | gene1591 | 1,4-dihydroxy-2-naphthoate octaprenyltransferase          | WP_012420531.1 |
| AMUC_RS03210 | 0.216 | 0.001073 | gene640  | Maf-like protein                                          | WP_012419638.1 |
| AMUC_RS10595 | 0.216 | 0.002987 | gene2113 | Hypothetical protein                                      | WP_042448388.1 |
| AMUC_RS02035 | 0.216 | 0.001754 | gene405  | Hypothetical protein                                      | WP_012419418.1 |
| AMUC_RS09220 | 0.215 | 0.004583 | gene1836 | Acyl-ACP thioesterase                                     | WP_012420757.1 |
| AMUC_RS07620 | 0.215 | 0.000805 | gene1515 | Hypothetical protein                                      | WP_052294501.1 |
| AMUC_RS04245 | 0.214 | 0.025088 | gene847  | Rhomboid family intramembrane serine protease             | WP_012419836.1 |

|              |       |          |          |                                                                   |                |
|--------------|-------|----------|----------|-------------------------------------------------------------------|----------------|
| AMUC_RS12250 | 0.214 | 0.000212 | gene2299 | Acyl-Coa synthetase (AMP-forming)/AMP-acid ligase II-like protein | WP_012421182.1 |
| AMUC_RS09515 | 0.213 | 0.003271 | gene1895 | Hypothetical protein                                              | WP_012420816.1 |
| AMUC_RS09235 | 0.211 | 0.002065 | gene1839 | DNA-binding response regulator                                    | WP_012420760.1 |
| AMUC_RS08480 | 0.211 | 6.73E-06 | gene1688 | Type II secretion system protein E                                | WP_012420621.1 |
| AMUC_RS12060 | 0.211 | 0.046325 | gene1512 | Hypothetical protein                                              | WP_052294466.1 |
| AMUC_RS03775 | 0.211 | 0.004392 | gene752  | Terpene cyclase/mutase family protein                             | WP_012419747.1 |
| AMUC_RS07850 | 0.211 | 5.3E-05  | gene1561 | Signal peptidase I                                                | WP_042448113.1 |
| AMUC_RS11405 | 0.211 | 9.08E-05 | gene2275 | NAD(P)H-dependent oxidoreductase                                  | WP_012421160.1 |
| AMUC_RS11375 | 0.210 | 0.000519 | gene2269 | Hydrogenase maturation protease                                   | WP_012421154.1 |
| AMUC_RS12080 | 0.209 | 0.001299 | gene1601 | Peptidase A24A domain-containing protein                          | WP_012420539.1 |
| AMUC_RS09010 | 0.209 | 4.01E-05 | gene1794 | Hypothetical protein                                              | WP_012420720.1 |
| AMUC_RS09415 | 0.208 | 0.002855 | gene1875 | Hypothetical protein                                              | WP_012420796.1 |
| AMUC_RS02050 | 0.207 | 0.001636 | gene408  | Chloride channel protein                                          | WP_012419421.1 |
| AMUC_RS05465 | 0.207 | 0.005685 | gene1089 | Hypothetical protein                                              | WP_042447864.1 |
| AMUC_RS03315 | 0.206 | 0.009353 | gene661  | Rna (cytidine-2'-O)-methyltransferase                             | WP_012419660.1 |
| AMUC_RS07855 | 0.205 | 0.001056 | gene1562 | Glycolate oxidase                                                 | WP_012420503.1 |
| AMUC_RS06365 | 0.205 | 0.001395 | gene1267 | Mannose-1-phosphate guanylyltransferase                           | WP_012420232.1 |
| AMUC_RS06320 | 0.204 | 0.00034  | gene1258 | Phosphopyruvate hydratase                                         | WP_042448954.1 |
| AMUC_RS09620 | 0.203 | 0.036821 | gene1916 | Metallophosphoesterase                                            | WP_012420835.1 |
| AMUC_RS10350 | 0.203 | 0.001419 | gene2065 | Hypothetical protein                                              | WP_042448356.1 |
| AMUC_RS04750 | 0.202 | 0.006601 | gene947  | Hypothetical protein                                              | WP_012419926.1 |
| AMUC_RS01205 | 0.202 | 0.019451 | gene238  | Hypothetical protein                                              | WP_012419274.1 |
| AMUC_RS05230 | 0.202 | 0.000974 | gene1044 | Monogalactosyldiacylglycerol synthase                             | WP_012420020.1 |
| AMUC_RS05905 | 0.202 | 0.006328 | gene1175 | Cell division protein FtsA                                        | WP_012420142.1 |
| AMUC_RS00600 | 0.202 | 0.008758 | gene120  | RND family efflux transporter MFP subunit                         | WP_012419162.1 |
| AMUC_RS04785 | 0.201 | 0.000334 | gene954  | Catalytic domain of components of various dehydrogenase complexes | WP_012419933.1 |
| AMUC_RS00240 | 0.201 | 0.004851 | gene47   | Peptide chain release factor 1                                    | WP_012419103.1 |
| AMUC_RS05175 | 0.200 | 0.003926 | gene1033 | Hypothetical protein                                              | WP_052294451.1 |
| AMUC_RS04895 | 0.200 | 0.000123 | gene976  | Peptide methionine sulfoxide reductase MsrB                       | WP_012419953.1 |
| AMUC_RS00040 | 0.200 | 0.00042  | gene7    | Hypothetical protein                                              | WP_012419068.1 |
| AMUC_RS00120 | 0.200 | 0.038385 | gene23   | G-D-S-L family lipolytic protein                                  | WP_012419084.1 |
| AMUC_RS03235 | 0.197 | 0.002528 | gene645  | Thiamine-monophosphate kinase                                     | WP_012419644.1 |
| AMUC_RS00045 | 0.197 | 0.00615  | gene8    | Hypothetical protein                                              | WP_012419069.1 |
| AMUC_RS10095 | 0.197 | 0.001455 | gene2013 | Hypothetical protein                                              | WP_012420919.1 |
| AMUC_RS09250 | 0.196 | 0.013931 | gene1842 | Hypothetical protein                                              | WP_012420763.1 |
| AMUC_RS08760 | 0.196 | 0.001599 | gene1744 | Hypothetical protein                                              | WP_012420675.1 |
| AMUC_RS03155 | 0.195 | 0.004933 | gene629  | Tetraacyldisaccharide 4'-kinase                                   | WP_012419627.1 |
| AMUC_RS03550 | 0.195 | 0.000338 | gene707  | Peptidoglycan glycosyltransferase                                 | WP_012419704.1 |

|              |       |          |          |                                                                                                                     |                |
|--------------|-------|----------|----------|---------------------------------------------------------------------------------------------------------------------|----------------|
| AMUC_RS03615 | 0.195 | 0.004957 | gene720  | Lipoyl(octanoyl) transferase                                                                                        | WP_012419717.1 |
| AMUC_RS08755 | 0.194 | 0.000265 | gene1743 | Hypothetical protein                                                                                                | WP_042448202.1 |
| AMUC_RS07720 | 0.194 | 0.015472 | gene1535 | RNA pseudouridine synthase                                                                                          | WP_012420478.1 |
| AMUC_RS02815 | 0.194 | 0.001004 | gene561  | Peptidoglycan glycosyltransferase                                                                                   | WP_012419567.1 |
| AMUC_RS11970 | 0.194 | 0.023512 | gene1150 | Group 1 glycosyl transferase                                                                                        | WP_012420118.1 |
| AMUC_RS03845 | 0.194 | 0.031194 | gene766  | Radical SAM protein                                                                                                 | WP_012419759.1 |
| AMUC_RS00095 | 0.193 | 1.92E-05 | gene18   | Glycosyl hydrolase family 109 protein 1                                                                             | WP_012419079.1 |
| AMUC_RS10975 | 0.193 | 0.033873 | gene2188 | Rubrerhythrin                                                                                                       | WP_042448418.1 |
| AMUC_RS00785 | 0.193 | 0.001495 | gene156  | Hypothetical protein                                                                                                | WP_042447469.1 |
| AMUC_RS00710 | 0.193 | 0.014881 | gene142  | Hypothetical protein                                                                                                | WP_052294411.1 |
| AMUC_RS09475 | 0.191 | 0.000409 | gene1887 | Hypothetical protein                                                                                                | WP_012420808.1 |
| AMUC_RS07050 | 0.191 | 0.044265 | gene1402 | Ribosome recycling factor                                                                                           | WP_012420357.1 |
| AMUC_RS01020 | 0.191 | 0.049097 | gene202  | Hypothetical protein                                                                                                | WP_012419237.1 |
| AMUC_RS00330 | 0.191 | 0.034538 | gene66   | Manganese ABC transporter permease                                                                                  | WP_012419117.1 |
| AMUC_RS04935 | 0.189 | 0.009642 | gene984  | Cupin                                                                                                               | WP_012419961.1 |
| AMUC_RS10395 | 0.188 | 0.030814 | gene2074 | N-acylglucosamine 2-epimerase                                                                                       | WP_012420974.1 |
| AMUC_RS08985 | 0.187 | 0.001628 | gene1789 | Cobyric acid synthase                                                                                               | WP_012420716.1 |
| AMUC_RS00940 | 0.187 | 0.032378 | gene186  | Hypothetical protein                                                                                                | WP_012419222.1 |
| AMUC_RS11320 | 0.186 | 0.004022 | gene2258 | Peptidyl-tRNA hydrolase                                                                                             | WP_012421144.1 |
| AMUC_RS11370 | 0.185 | 0.001338 | gene2268 | Hypothetical protein                                                                                                | WP_031931547.1 |
| AMUC_RS03585 | 0.184 | 0.00385  | gene714  | UDP-N-acetylglucosamine--N-acetylmuramyl-(pentapeptide) pyrophosphoryl-undecaprenol N-acetylglucosamine transferase | WP_012419711.1 |
| AMUC_RS11395 | 0.183 | 0.036992 | gene2273 | Hypothetical protein                                                                                                | WP_012421158.1 |
| AMUC_RS02765 | 0.182 | 0.001449 | gene551  | DUF5069 domain-containing protein                                                                                   | WP_012419557.1 |
| AMUC_RS09245 | 0.182 | 0.000839 | gene1841 | Delta-aminolevulinic acid dehydratase                                                                               | WP_031931218.1 |
| AMUC_RS09035 | 0.181 | 0.009116 | gene1799 | Dihydrolipoamide succinyltransferase                                                                                | WP_012420725.1 |
| AMUC_RS04095 | 0.180 | 0.021449 | gene816  | Hypothetical protein                                                                                                | WP_042447747.1 |
| AMUC_RS01990 | 0.179 | 0.001012 | gene396  | Hypothetical protein                                                                                                | WP_012419410.1 |
| AMUC_RS08655 | 0.177 | 0.004709 | gene1723 | 4-alpha-glucanotransferase                                                                                          | WP_012420656.1 |
| AMUC_RS11155 | 0.177 | 0.049503 | gene2225 | Group 1 glycosyl transferase                                                                                        | WP_012421113.1 |
| AMUC_RS01900 | 0.177 | 0.019362 | gene378  | Deoxycytidylate deaminase                                                                                           | WP_012419394.1 |
| AMUC_RS02560 | 0.177 | 0.044701 | gene510  | Peptidase M23                                                                                                       | WP_012419518.1 |
| AMUC_RS09800 | 0.177 | 0.004696 | gene1952 | Exo-alpha-sialidase                                                                                                 | WP_012420867.1 |
| AMUC_RS10405 | 0.176 | 0.015804 | gene2076 | Aminodeoxychorismate synthase component I                                                                           | WP_012420976.1 |
| AMUC_RS02850 | 0.176 | 0.003867 | gene568  | Hypothetical protein                                                                                                | WP_012419573.1 |
| AMUC_RS09280 | 0.176 | 0.007349 | gene1848 | 1-deoxy-D-xylulose-5-phosphate reductoisomerase                                                                     | WP_012420769.1 |
| AMUC_RS03265 | 0.175 | 0.027309 | gene651  | Ribonuclease III                                                                                                    | WP_052294432.1 |
| AMUC_RS07610 | 0.174 | 0.001328 | gene1513 | Hypothetical protein                                                                                                | WP_052294467.1 |
| AMUC_RS07245 | 0.173 | 0.034492 | gene1441 | Hypothetical protein                                                                                                | WP_012420399.1 |

|              |       |          |          |                                                                         |                |
|--------------|-------|----------|----------|-------------------------------------------------------------------------|----------------|
| AMUC_RS11715 | 0.172 | 0.001428 | gene218  | Hypothetical protein                                                    | WP_012419253.1 |
| AMUC_RS10605 | 0.171 | 0.018065 | gene2115 | Terpene cyclase/mutase family protein                                   | WP_012421012.1 |
| AMUC_RS08535 | 0.170 | 0.000383 | gene1699 | Hypothetical protein                                                    | WP_052294473.1 |
| AMUC_RS07085 | 0.169 | 0.005973 | gene1409 | Recombination protein RecR                                              | WP_012420364.1 |
| AMUC_RS04710 | 0.167 | 0.007818 | gene939  | Alkaline phosphatase                                                    | WP_012419918.1 |
| AMUC_RS01585 | 0.167 | 0.00426  | gene314  | DNA mismatch repair protein mutt                                        | WP_012419335.1 |
| AMUC_RS10765 | 0.166 | 0.009634 | gene2147 | Beta-N-acetylhexosaminidase                                             | WP_012421043.1 |
| AMUC_RS02790 | 0.166 | 0.024533 | gene556  | F0F1-type ATP synthase delta subunit-like protein                       | WP_012419562.1 |
| AMUC_RS09440 | 0.165 | 0.020644 | gene1880 | Serine/threonine protein kinase                                         | WP_012420801.1 |
| AMUC_RS11285 | 0.164 | 0.014789 | gene2251 | Hypothetical protein                                                    | WP_012421137.1 |
| AMUC_RS08775 | 0.164 | 0.01087  | gene1747 | Diacylglycerol kinase catalytic subunit                                 | WP_012420678.1 |
| AMUC_RS05125 | 0.164 | 0.024896 | gene1023 | Carbon starvation protein csta                                          | WP_012419998.1 |
| AMUC_RS06795 | 0.164 | 0.010932 | gene1351 | Hypothetical protein                                                    | WP_012420307.1 |
| AMUC_RS11280 | 0.160 | 0.017098 | gene2250 | Coproporphyrinogen III oxidase                                          | WP_012421136.1 |
| AMUC_RS05695 | 0.160 | 0.049012 | gene1135 | MFS transporter                                                         | WP_012420105.1 |
| AMUC_RS01185 | 0.159 | 0.029775 | gene234  | Single-stranded DNA-binding protein                                     | WP_012419270.1 |
| AMUC_RS10780 | 0.159 | 0.005298 | gene2150 | Hypothetical protein                                                    | WP_042448395.1 |
| AMUC_RS03085 | 0.159 | 0.006033 | gene616  | Prepilin-type N-terminal cleavage/methylation domain-containing protein | WP_012419615.1 |
| AMUC_RS03025 | 0.158 | 0.033808 | gene603  | Indole-3-glycerol-phosphate synthase                                    | WP_012419605.1 |
| AMUC_RS10415 | 0.158 | 0.001581 | gene2078 | 12-oxophytodienoate reductase                                           | WP_042449258.1 |
| AMUC_RS03570 | 0.158 | 0.005061 | gene711  | UDP-N-acetylmuramoylalanine--D-glutamate ligase                         | WP_012419708.1 |
| AMUC_RS04480 | 0.155 | 0.002142 | gene893  | Potassium-transporting atpase C subunit                                 | WP_012419880.1 |
| AMUC_RS09505 | 0.154 | 0.013092 | gene1893 | Glutamyl-tRNA(Gln) amidotransferase subunit A                           | WP_012420814.1 |
| AMUC_RS07960 | 0.154 | 0.046152 | gene1583 | Hypothetical protein                                                    | WP_012420523.1 |
| AMUC_RS03760 | 0.151 | 0.003271 | gene749  | Hypothetical protein                                                    | WP_031930442.1 |
| AMUC_RS05490 | 0.150 | 0.042967 | gene1094 | Hypothetical protein                                                    | WP_042447867.1 |
| AMUC_RS08005 | 0.150 | 0.022459 | gene1592 | 3-dehydroquinase                                                        | WP_012420532.1 |
| AMUC_RS01665 | 0.149 | 0.046984 | gene330  | Hypothetical protein                                                    | WP_012419349.1 |
| AMUC_RS06760 | 0.148 | 0.017819 | gene1344 | D-hexose-6-phosphate mutarotase                                         | WP_012420301.1 |
| AMUC_RS00620 | 0.148 | 0.004311 | gene124  | EstA family serine hydrolase                                            | WP_012419166.1 |
| AMUC_RS12135 | 0.147 | 0.004022 | gene1888 | VWA domain-containing protein                                           | WP_012420809.1 |
| AMUC_RS08530 | 0.146 | 0.048749 | gene1698 | TIGR00299 family protein                                                | WP_052294472.1 |
| AMUC_RS05910 | 0.145 | 0.010228 | gene1176 | Hypothetical protein                                                    | WP_012420143.1 |
| AMUC_RS02440 | 0.145 | 0.014482 | gene486  | Hypothetical protein                                                    | WP_052294424.1 |
| AMUC_RS12085 | 0.145 | 0.015299 | gene1621 | Prepilin-type N-terminal cleavage/methylation domain-containing protein | WP_012420559.1 |

|                            |        |          |          |                                                                         |                |
|----------------------------|--------|----------|----------|-------------------------------------------------------------------------|----------------|
| AMUC_RS08575               | 0.145  | 0.009569 | gene1707 | Proton-translocating NADH-quinone oxidoreductase subunit L              | WP_012420641.1 |
| AMUC_RS04745               | 0.144  | 0.030692 | gene946  | DNA repair protein RecN                                                 | WP_012419925.1 |
| AMUC_RS03535               | 0.143  | 0.013947 | gene704  | MraZ protein                                                            | WP_012419701.1 |
| AMUC_RS08865               | 0.143  | 0.010643 | gene1765 | Hypothetical protein                                                    | WP_012420694.1 |
| AMUC_RS02190               | 0.143  | 0.022721 | gene436  | Prepilin-type N-terminal cleavage/methylation domain-containing protein | WP_012419448.1 |
| AMUC_RS00065               | 0.142  | 0.004741 | gene12   | DNA ligase (NAD(+)) LigA                                                | WP_012419073.1 |
| AMUC_RS07615               | 0.142  | 0.011411 | gene1514 | Hypothetical protein                                                    | WP_012420460.1 |
| AMUC_RS10375               | 0.141  | 0.00205  | gene2070 | Hypothetical protein                                                    | WP_012420970.1 |
| AMUC_RS03645               | 0.140  | 0.046754 | gene726  | 3-dehydroquinase synthase                                               | WP_012419723.1 |
| AMUC_RS03715               | 0.137  | 0.02625  | gene740  | DNA helicase UvrD                                                       | WP_012419735.1 |
| AMUC_RS01930               | 0.136  | 0.004592 | gene384  | DNA mismatch repair protein MutS                                        | WP_012419400.1 |
| AMUC_RS01805               | 0.135  | 0.038385 | gene358  | GTPase Der                                                              | WP_012419376.1 |
| AMUC_RS06370               | 0.134  | 0.02625  | gene1268 | Di-trans%2Cpoly-cis-decaprenylcistransferase                            | WP_012420233.1 |
| AMUC_RS09540               | 0.133  | 0.011153 | gene1900 | Hypothetical protein                                                    | WP_012420820.1 |
| AMUC_RS04630               | 0.131  | 0.016355 | gene923  | Glycoside hydrolase                                                     | WP_012419903.1 |
| AMUC_RS04500               | 0.130  | 0.036482 | gene897  | ATP-dependent chaperone ClpB                                            | WP_012419884.1 |
| AMUC_RS11955               | 0.130  | 0.017057 | gene1041 | SSS sodium solute transporter superfamily protein                       | WP_012420017.1 |
| AMUC_RS05995               | 0.129  | 0.006316 | gene1193 | Hypothetical protein                                                    | WP_052294454.1 |
| AMUC_RS10660               | 0.127  | 0.01976  | gene2126 | Phenylalanine--tRNA ligase subunit beta                                 | WP_012421023.1 |
| AMUC_RS09990               | 0.126  | 0.042311 | gene1992 | Alpha-glucosidase                                                       | WP_012420898.1 |
| AMUC_RS08925               | 0.124  | 0.024201 | gene1777 | 6-phosphofructokinase                                                   | WP_012420704.1 |
| AMUC_RS09985               | 0.121  | 0.003247 | gene1991 | Group 1 glycosyl transferase                                            | WP_012420897.1 |
| AMUC_RS02485               | 0.121  | 0.045917 | gene495  | Sulfatase                                                               | WP_012419504.1 |
| AMUC_RS10510               | 0.117  | 0.037262 | gene2096 | Hypothetical protein                                                    | WP_042448368.1 |
| AMUC_RS09405               | 0.116  | 0.036195 | gene1873 | Miro domain-containing protein                                          | WP_012420794.1 |
| AMUC_RS08170               | 0.114  | 0.043033 | gene1626 | Sodium-translocating pyrophosphatase                                    | WP_042449078.1 |
| AMUC_RS09980               | 0.111  | 0.020882 | gene1990 | Glycoside hydrolase                                                     | WP_012420896.1 |
| AMUC_RS04790               | 0.111  | 0.044701 | gene955  | Transketolase                                                           | WP_012419934.1 |
| AMUC_RS00300               | 0.110  | 0.044701 | gene60   | Single-stranded-DNA-specific exonuclease RecJ                           | WP_012419112.1 |
| AMUC_RS09090               | 0.105  | 0.017697 | gene1810 | Hypothetical protein                                                    | WP_012420737.1 |
| AMUC_RS08750               | 0.105  | 0.014075 | gene1742 | Type II and III secretion system protein                                | WP_012420673.1 |
| AMUC_RS05510               | 0.104  | 0.037398 | gene1098 | PEP-CTERM domain protein                                                | WP_042447869.1 |
| AMUC_RS02865               | 0.098  | 0.047706 | gene571  | Arabinose-5-phosphate isomerase                                         | WP_012419576.1 |
| <b>Downregulated genes</b> |        |          |          |                                                                         |                |
| AMUC_RS02520               | -0.099 | 0.038783 | gene502  | Phosphoribosylaminoimidazole synthetase                                 | WP_012419510.1 |
| AMUC_RS09350               | -0.108 | 0.03357  | gene1862 | 1%2C4-alpha-glucan-branching protein                                    | WP_012420783.1 |

|              |        |          |          |                                                                   |                |
|--------------|--------|----------|----------|-------------------------------------------------------------------|----------------|
| AMUC_RS11605 | -0.112 | 0.006846 | gene2315 | Preprotein translocase subunit SecA                               | WP_012421198.1 |
| AMUC_RS10640 | -0.112 | 0.048749 | gene2122 | Serine/threonine protein kinase                                   | WP_012421019.1 |
| AMUC_RS09015 | -0.115 | 0.038496 | gene1795 | Amidohydrolase                                                    | WP_012420721.1 |
| AMUC_RS06585 | -0.115 | 0.007716 | gene1310 | Hypothetical protein                                              | WP_031930862.1 |
| AMUC_RS09095 | -0.116 | 0.048993 | gene1811 | Endoribonuclease                                                  | WP_042449145.1 |
| AMUC_RS06645 | -0.118 | 0.018065 | gene1321 | Hypothetical protein                                              | WP_012420280.1 |
| AMUC_RS00745 | -0.119 | 0.011153 | gene148  | DNA topoisomerase                                                 |                |
| AMUC_RS03620 | -0.121 | 0.006504 | gene721  | 3-isopropylmalate dehydratase large subunit                       | WP_012419718.1 |
| AMUC_RS09425 | -0.121 | 0.014678 | gene1877 | Glycosyl transferase family 2                                     | WP_012420798.1 |
| AMUC_RS08545 | -0.122 | 0.013263 | gene1701 | Hypothetical protein                                              | WP_042448189.1 |
| AMUC_RS03690 | -0.122 | 0.046944 | gene735  | Hypothetical protein                                              | WP_012419730.1 |
| AMUC_RS01005 | -0.123 | 0.024637 | gene199  | PDZ/DHR/GLGF domain-containing protein                            | WP_012419234.1 |
| AMUC_RS08810 | -0.124 | 0.004045 | gene1754 | Acetolactate synthase catalytic subunit                           |                |
| AMUC_RS00675 | -0.128 | 0.022111 | gene135  | FAD-binding protein                                               | WP_042448535.1 |
| AMUC_RS03925 | -0.128 | 0.006873 | gene782  | Branched chain amino acid aminotransferase                        | WP_012419775.1 |
| AMUC_RS00255 | -0.129 | 0.044265 | gene50   | Diaminopimelate epimerase                                         | WP_012419106.1 |
| AMUC_RS04380 | -0.131 | 0.035301 | gene873  | tRNA uridine(34) 5-carboxymethylaminomethyl synthesis enzyme MnmG | WP_012419860.1 |
| AMUC_RS05755 | -0.134 | 0.007966 | gene1147 | Sulfatase                                                         | WP_012420115.1 |
| AMUC_RS12205 | -0.136 | 0.005298 | gene2154 | MBL fold metallo-hydrolase                                        | WP_012421050.1 |
| AMUC_RS11410 | -0.137 | 0.047028 | gene2276 | Histidinol-phosphate aminotransferase                             | WP_012421161.1 |
| AMUC_RS00890 | -0.138 | 0.010129 | gene176  | Cell division protein FtsA                                        | WP_051729163.1 |
| AMUC_RS03205 | -0.138 | 0.006942 | gene639  | Pyridoxal-5'-phosphate-dependent protein subunit beta             | WP_012419637.1 |
| AMUC_RS01830 | -0.139 | 0.008499 | gene363  | DNA modification methylase                                        | WP_012419380.1 |
| AMUC_RS09470 | -0.140 | 0.036634 | gene1886 | Hypothetical protein                                              | WP_012420807.1 |
| AMUC_RS07555 | -0.142 | 0.001607 | gene1501 | Capsular polysaccharide biosynthesis protein                      | WP_012420451.1 |
| AMUC_RS03750 | -0.142 | 0.006901 | gene747  | Hypothetical protein                                              | WP_012419742.1 |
| AMUC_RS11035 | -0.144 | 0.003484 | gene2200 | Aldehyde dehydrogenase                                            | WP_012421090.1 |
| AMUC_RS09075 | -0.145 | 0.015304 | gene1807 | Tryptophan synthase subunit beta                                  | WP_012420733.1 |
| AMUC_RS08025 | -0.145 | 0.01978  | gene1596 | Hypothetical protein                                              | WP_052294469.1 |
| AMUC_RS05495 | -0.145 | 0.045917 | gene1095 | Disulfide bond chaperone                                          | WP_012420066.1 |
| AMUC_RS08830 | -0.145 | 0.026312 | gene1758 | Leucine--tRNA ligase                                              | WP_012420688.1 |
| AMUC_RS06785 | -0.146 | 0.007313 | gene1349 | PEP-CTERM domain protein                                          | WP_031930890.1 |
| AMUC_RS04020 | -0.146 | 0.0024   | gene801  | Phospho-2-dehydro-3-deoxyheptonate aldolase                       | WP_012419795.1 |
| AMUC_RS04260 | -0.146 | 0.003271 | gene850  | O-acetylhomoserine aminocarboxypropyltransferase                  | WP_042448774.1 |
| AMUC_RS04050 | -0.146 | 0.025088 | gene807  | Hypothetical protein                                              | WP_031930489.1 |
| AMUC_RS04645 | -0.147 | 0.030616 | gene926  | Cyclic nucleotide-binding protein                                 | WP_012419906.1 |

|              |        |          |          |                                                                                     |                |
|--------------|--------|----------|----------|-------------------------------------------------------------------------------------|----------------|
| AMUC_RS02605 | -0.148 | 0.029285 | gene519  | Three-deoxy-D-manno-octulosonic-acid transferase                                    | WP_012419527.1 |
| AMUC_RS06805 | -0.148 | 0.004018 | gene1353 | Thioredoxin-disulfide reductase                                                     | WP_012420309.1 |
| AMUC_RS05560 | -0.148 | 0.020619 | gene1108 | Transporter                                                                         | WP_012420080.1 |
| AMUC_RS07975 | -0.150 | 0.048548 | gene1586 | Guanylate kinase                                                                    | WP_012420526.1 |
| AMUC_RS03835 | -0.152 | 0.001088 | gene764  | Phosphoglycerate dehydrogenase                                                      | WP_012419757.1 |
| AMUC_RS10580 | -0.154 | 0.01885  | gene2110 | PEP-CTERM domain protein                                                            | WP_012421007.1 |
| AMUC_RS09355 | -0.155 | 0.049504 | gene1863 | Hypothetical protein                                                                | WP_042448279.1 |
| AMUC_RS08490 | -0.155 | 0.025098 | gene1690 | Hypothetical protein                                                                | WP_012420623.1 |
| AMUC_RS02240 | -0.155 | 0.000669 | gene446  | OmpH family outer membrane protein                                                  | WP_022198432.1 |
| AMUC_RS07460 | -0.155 | 0.009633 | gene1483 | Hydrogenase accessory protein HypB                                                  | WP_012420437.1 |
| AMUC_RS09020 | -0.155 | 0.000929 | gene1796 | Dihydrolipoyl dehydrogenase                                                         | WP_012420722.1 |
| AMUC_RS04255 | -0.155 | 0.018421 | gene849  | PEP-CTERM domain protein                                                            | WP_042447757.1 |
| AMUC_RS05500 | -0.156 | 0.017734 | gene1096 | Peptidyl-prolyl cis-trans isomerase                                                 | WP_012420067.1 |
| AMUC_RS05295 | -0.157 | 0.029956 | gene1057 | Succinate dehydrogenase (or fumarate reductase) cytochrome b subunit%2C b558 family | WP_012420030.1 |
| AMUC_RS11425 | -0.158 | 0.008499 | gene2279 | Transcriptional regulator                                                           | WP_012421163.1 |
| AMUC_RS02990 | -0.158 | 0.008954 | gene596  | Hypothetical protein                                                                | WP_012419600.1 |
| AMUC_RS10080 | -0.158 | 0.000918 | gene2010 | Glutamyl-Q tRNA(Asp) synthetase                                                     | WP_012420916.1 |
| AMUC_RS05630 | -0.159 | 0.014474 | gene1122 | ATP-dependent Clp protease proteolytic subunit                                      | WP_012420092.1 |
| AMUC_RS01440 | -0.159 | 0.004022 | gene285  | 4-hydroxy-tetrahydrodipicolinate synthase                                           | WP_012419316.1 |
| AMUC_RS09260 | -0.159 | 0.004598 | gene1844 | Threonine--tRNA ligase                                                              | WP_012420764.1 |
| AMUC_RS03915 | -0.160 | 0.027239 | gene780  | Class II fructose-bisphosphate aldolase                                             | WP_012419773.1 |
| AMUC_RS02590 | -0.160 | 0.038699 | gene516  | Phosphopantothenoylcysteine decarboxylase                                           | WP_012419524.1 |
| AMUC_RS12020 | -0.160 | 0.006873 | gene1337 | Inner membrane insertion protein                                                    | WP_012420294.1 |
| AMUC_RS04355 | -0.161 | 0.003957 | gene868  | ATP-dependent RNA helicase HrpA                                                     | WP_052294440.1 |
| AMUC_RS02985 | -0.161 | 0.010168 | gene595  | Biopolymer transporter ExbD/ToIR                                                    | WP_012419599.1 |
| AMUC_RS07680 | -0.161 | 0.004095 | gene1527 | Hypothetical protein                                                                | WP_042448085.1 |
| AMUC_RS09700 | -0.162 | 0.003392 | gene1932 | PUA domain containing protein                                                       | WP_012420850.1 |
| AMUC_RS09175 | -0.163 | 0.029347 | gene1827 | Hypothetical protein                                                                | WP_012420750.1 |
| AMUC_RS02890 | -0.164 | 0.010448 | gene576  | Gamma-glutamyl-phosphate reductase                                                  | WP_012419581.1 |
| AMUC_RS03320 | -0.164 | 0.025952 | gene662  | Hypothetical protein                                                                | WP_012419661.1 |
| AMUC_RS04305 | -0.165 | 0.001471 | gene858  | Lysine--tRNA ligase                                                                 | WP_012419847.1 |
| AMUC_RS10840 | -0.166 | 0.005856 | gene2161 | Thymidylate synthase                                                                | WP_012421056.1 |
| AMUC_RS02530 | -0.166 | 0.006868 | gene504  | RNA polymerase sigma factor RpoE                                                    | WP_012419512.1 |
| AMUC_RS02610 | -0.167 | 0.005353 | gene520  | Methyltransferase                                                                   | WP_012419528.1 |
| AMUC_RS09975 | -0.169 | 0.008469 | gene1989 | Peptide deformylase                                                                 | WP_012420895.1 |
| AMUC_RS08415 | -0.170 | 0.001298 | gene1675 | Citrate synthase                                                                    | WP_012420608.1 |
| AMUC_RS01420 | -0.170 | 0.046152 | gene281  | Xylose isomerase                                                                    | WP_012419312.1 |

|              |        |          |          |                                                                        |                |
|--------------|--------|----------|----------|------------------------------------------------------------------------|----------------|
| AMUC_RS00150 | -0.171 | 0.004311 | gene29   | ATPase AAA                                                             | WP_042448497.1 |
| AMUC_RS07390 | -0.174 | 0.011517 | gene1469 | 4-hydroxy-3-methylbut-2-en-1-yl diphosphate synthase (flavodoxin)      | WP_012420427.1 |
| AMUC_RS02305 | -0.174 | 0.00585  | gene459  | Glutamate-1-semialdehyde 2%2C1-aminomutase                             | WP_012419470.1 |
| AMUC_RS09555 | -0.177 | 0.00449  | gene1903 | Peptidase S1 and S6 chymotrypsin/Hap                                   | WP_012420823.1 |
| AMUC_RS02795 | -0.179 | 0.008417 | gene557  | ATP synthase subunit B                                                 | WP_012419563.1 |
| AMUC_RS06110 | -0.180 | 0.000332 | gene1216 | Hypothetical protein                                                   | WP_012420184.1 |
| AMUC_RS06390 | -0.180 | 0.04025  | gene1272 | Helicase c2                                                            | WP_012420237.1 |
| AMUC_RS05640 | -0.181 | 0.000128 | gene1124 | Outer membrane protein assembly factor BamA                            | WP_012420094.1 |
| AMUC_RS00160 | -0.181 | 0.027001 | gene31   | NAD-dependent epimerase/dehydratase family protein                     | WP_012419091.1 |
| AMUC_RS03855 | -0.181 | 0.001581 | gene768  | Transcriptional regulator                                              | WP_012419761.1 |
| AMUC_RS02910 | -0.181 | 0.000256 | gene580  | GreA/GreB family elongation factor                                     | WP_012419584.1 |
| AMUC_RS07160 | -0.182 | 0.00341  | gene1424 | Hypothetical protein                                                   | WP_042448019.1 |
| AMUC_RS07625 | -0.183 | 0.004546 | gene1516 | Hypothetical protein                                                   | WP_042448082.1 |
| AMUC_RS04605 | -0.183 | 0.004295 | gene918  | SAM-dependent methyltransferase                                        | WP_012419898.1 |
| AMUC_RS10860 | -0.184 | 0.020945 | gene2165 | MATE efflux family protein                                             | WP_012421060.1 |
| AMUC_RS12200 | -0.184 | 0.002034 | gene2144 | Phage-associated protein-like protein                                  | WP_012421041.1 |
| AMUC_RS10615 | -0.184 | 0.00468  | gene2117 | Hypothetical protein                                                   | WP_012421014.1 |
| AMUC_RS02740 | -0.185 | 0.023704 | gene546  | Glycosyl transferase                                                   | WP_012419552.1 |
| AMUC_RS09940 | -0.185 | 0.025632 | gene1982 | Formate--tetrahydrofolate ligase                                       | WP_042449223.1 |
| AMUC_RS00800 | -0.186 | 0.003192 | gene159  | Hypothetical protein                                                   | WP_042447473.1 |
| AMUC_RS10795 | -0.187 | 0.000206 | gene2153 | RNA helicase                                                           | WP_012421049.1 |
| AMUC_RS00380 | -0.187 | 0.002347 | gene76   | 5-oxopent-3-ene-1%2C2%2C5-tricarboxylate decarboxylase                 | WP_012419124.1 |
| AMUC_RS06020 | -0.187 | 8.86E-05 | gene1198 | UDP-glucose 4-epimerase gale                                           | WP_012420166.1 |
| AMUC_RS00390 | -0.187 | 0.000453 | gene78   | ATP/GTP-binding protein                                                | WP_012419126.1 |
| AMUC_RS04335 | -0.187 | 0.008223 | gene864  | Imidazole glycerol phosphate synthase cyclase subunit                  | WP_012419852.1 |
| AMUC_RS00900 | -0.188 | 0.005969 | gene178  | Phosphomannomutase                                                     | WP_042448559.1 |
| AMUC_RS04270 | -0.189 | 0.003808 | gene852  | Radical SAM protein                                                    | WP_012419841.1 |
| AMUC_RS08725 | -0.189 | 0.006718 | gene1737 | ATP-dependent helicase HrpB                                            | WP_012420668.1 |
| AMUC_RS11565 | -0.190 | 0.000736 | gene2307 | Arginine--tRNA ligase                                                  | WP_012421190.1 |
| AMUC_RS01835 | -0.191 | 0.001122 | gene364  | Hypothetical protein                                                   | WP_012419381.1 |
| AMUC_RS04105 | -0.192 | 0.037676 | gene818  | Acyltransferase                                                        | WP_012419812.1 |
| AMUC_RS08975 | -0.192 | 0.009988 | gene1787 | Nicotinate-nucleotide--dimethylbenzimidazole phosphoribosyltransferase | WP_012420714.1 |
| AMUC_RS04110 | -0.193 | 0.002686 | gene819  | Hypothetical protein                                                   | WP_012419813.1 |
| AMUC_RS11300 | -0.194 | 0.039026 | gene2254 | Hypothetical protein                                                   | WP_042448455.1 |
| AMUC_RS11290 | -0.194 | 8.17E-05 | gene2252 | Serine--tRNA ligase                                                    | WP_012421138.1 |



|              |        |          |          |                                                                                    |                |
|--------------|--------|----------|----------|------------------------------------------------------------------------------------|----------------|
| AMUC_RS02340 | -0.195 | 0.000604 | gene466  | Bifunctional 3%2C4-dihydroxy-2-butanone 4-phosphate synthase/GTP cyclohydrolase II | WP_012419475.1 |
| AMUC_RS10960 | -0.195 | 0.007966 | gene2185 | Hypothetical protein                                                               | WP_012421077.1 |
| AMUC_RS11045 | -0.195 | 0.004744 | gene2202 | Hypothetical protein                                                               | WP_031931498.1 |
| AMUC_RS01565 | -0.196 | 0.006846 | gene310  | Signal transduction protein with effhand domain                                    | WP_012419331.1 |
| AMUC_RS06695 | -0.196 | 0.000648 | gene1331 | Carbamoyl-phosphate synthase small chain                                           | WP_012420290.1 |
| AMUC_RS05130 | -0.197 | 1.21E-05 | gene1024 | PEP-CTERM domain protein                                                           | WP_012419999.1 |
| AMUC_RS08040 | -0.197 | 7.27E-05 | gene1599 | Preprotein translocase subunit SecD                                                | WP_012420538.1 |
| AMUC_RS02235 | -0.198 | 0.004868 | gene445  | Pantoate--beta-alanine ligase                                                      | WP_012419457.1 |
| AMUC_RS05290 | -0.198 | 0.027001 | gene1056 | Succinate dehydrogenase                                                            | WP_042448869.1 |
| AMUC_RS04295 | -0.201 | 0.001609 | gene857  | Protein-serine/threonine phosphatase                                               | WP_012419846.1 |
| AMUC_RS01200 | -0.202 | 0.014678 | gene237  | PEP-CTERM domain protein                                                           | WP_012419273.1 |
| AMUC_RS03930 | -0.202 | 0.001555 | gene783  | Glucan endo-1%2C3-beta-D-glucosidase                                               | WP_012419776.1 |
| AMUC_RS00395 | -0.203 | 0.001137 | gene79   | Aspartyl-tRNA amidotransferase subunit B                                           | WP_012419127.1 |
| AMUC_RS01540 | -0.203 | 0.012254 | gene305  | Hypothetical protein                                                               | WP_052294415.1 |
| AMUC_RS06375 | -0.205 | 0.000526 | gene1269 | DNA topoisomerase IV subunit B                                                     | WP_012420234.1 |
| AMUC_RS08045 | -0.205 | 0.018699 | gene1600 | Signal transduction protein with effhand domain                                    | WP_022197508.1 |
| AMUC_RS08255 | -0.207 | 0.000172 | gene1643 | Formate acetyltransferase                                                          | WP_012420579.1 |
| AMUC_RS00110 | -0.207 | 0.001577 | gene21   | MFS transporter                                                                    | WP_012419082.1 |
| AMUC_RS05670 | -0.207 | 0.011054 | gene1130 | Acriflavin resistance protein                                                      | WP_012420100.1 |
| AMUC_RS00210 | -0.208 | 0.031397 | gene41   | Amino acid transporter                                                             | WP_042447403.1 |
| AMUC_RS03765 | -0.208 | 0.02625  | gene750  | Hypothetical protein                                                               | WP_012419745.1 |
| AMUC_RS01980 | -0.208 | 0.00538  | gene394  | Hypothetical protein                                                               | WP_012419408.1 |
| AMUC_RS07905 | -0.210 | 0.000526 | gene1572 | Imidazole glycerol phosphate synthase%2C glutamine amidotransferase subunit        | WP_012420512.1 |
| AMUC_RS08635 | -0.211 | 0.029927 | gene1719 | Riboflavin synthase subunit alpha                                                  | WP_012420653.1 |
| AMUC_RS06700 | -0.212 | 0.000765 | gene1332 | Carbamoyl phosphate synthase large subunit                                         | WP_012420291.1 |
| AMUC_RS08590 | -0.214 | 0.010737 | gene1710 | NADH dehydrogenase                                                                 | WP_012420644.1 |
| AMUC_RS11220 | -0.215 | 0.00196  | gene2238 | Methionine--tRNA ligase                                                            | WP_012421126.1 |
| AMUC_RS07950 | -0.215 | 0.000695 | gene1581 | Hypothetical protein                                                               | WP_012420521.1 |
| AMUC_RS07765 | -0.216 | 0.001244 | gene1544 | Bifunctional ornithine acetyltransferase/N-acetylglutamate synthase                | WP_012420485.1 |
| AMUC_RS08245 | -0.216 | 0.000376 | gene1641 | Hypothetical protein                                                               | WP_042448154.1 |
| AMUC_RS11095 | -0.217 | 0.000109 | gene2213 | Capsular polysaccharide biosynthesis protein                                       | WP_012421101.1 |
| AMUC_RS04740 | -0.217 | 0.01108  | gene945  | Heavy metal translocating P-type ATPase                                            | WP_012419924.1 |
| AMUC_RS01600 | -0.218 | 0.00198  | gene317  | Integration host factor subunit beta                                               | WP_012419338.1 |
| AMUC_RS00980 | -0.218 | 0.000683 | gene194  | CTP synthetase                                                                     | WP_012419229.1 |
| AMUC_RS04730 | -0.219 | 0.000242 | gene943  | Elongation factor P                                                                | WP_012419922.1 |

|              |        |          |          |                                                        |                |
|--------------|--------|----------|----------|--------------------------------------------------------|----------------|
| AMUC_RS01175 | -0.219 | 0.000101 | gene232  | dTDP-glucose 4,6-dehydratase                           | WP_012419268.1 |
| AMUC_RS02465 | -0.219 | 0.008914 | gene491  | Glycine cleavage system protein H                      | WP_012419500.1 |
| AMUC_RS05570 | -0.219 | 0.007966 | gene1110 | DNA-directed RNA polymerase subunit beta               |                |
| AMUC_RS04040 | -0.222 | 0.008179 | gene805  | Bifunctional riboflavin kinase/FMN adenylyltransferase | WP_012419799.1 |
| AMUC_RS09615 | -0.222 | 0.044937 | gene1915 | Aldo/keto reductase                                    | WP_012420834.1 |
| AMUC_RS02905 | -0.223 | 8.6E-06  | gene579  | Transketolase                                          | WP_042447629.1 |
| AMUC_RS00170 | -0.223 | 0.020695 | gene33   | Nucleotidyltransferase                                 | WP_042448500.1 |
| AMUC_RS03195 | -0.224 | 0.000103 | gene637  | Hypothetical protein                                   | WP_042447661.1 |
| AMUC_RS01515 | -0.226 | 0.000158 | gene300  | Phosphate acyltransferase                              | WP_012419323.1 |
| AMUC_RS02570 | -0.226 | 0.000895 | gene512  | Polyphosphate kinase                                   | WP_031930275.1 |
| AMUC_RS04080 | -0.227 | 0.003139 | gene813  | ADP-L-glycero-D-mannoheptose-6-epimerase               | WP_012419807.1 |
| AMUC_RS04795 | -0.227 | 0.002599 | gene956  | Pyruvate dehydrogenase                                 | WP_012419935.1 |
| AMUC_RS04010 | -0.227 | 0.01069  | gene799  | Hypothetical protein                                   | WP_012419793.1 |
| AMUC_RS08825 | -0.228 | 0.004432 | gene1757 | Ribulose-phosphate 3-epimerase                         | WP_012420687.1 |
| AMUC_RS04160 | -0.229 | 0.000109 | gene829  | Hypothetical protein                                   | WP_052294436.1 |
| AMUC_RS05985 | -0.230 | 0.000274 | gene1191 | Sulfatase                                              | WP_012420159.1 |
| AMUC_RS05725 | -0.231 | 0.005988 | gene1141 | Adenosylhomocysteinase                                 | WP_012420110.1 |
| AMUC_RS01270 | -0.232 | 0.01356  | gene251  | Hypothetical protein                                   | WP_012419286.1 |
| AMUC_RS05585 | -0.232 | 0.046984 | gene1113 | 50S ribosomal protein L1                               | WP_012420085.1 |
| AMUC_RS01905 | -0.232 | 0.009064 | gene379  | Hypothetical protein                                   | WP_042447558.1 |
| AMUC_RS01660 | -0.233 | 7.66E-05 | gene329  | Valine--tRNA ligase                                    | WP_012419348.1 |
| AMUC_RS05625 | -0.233 | 1.27E-05 | gene1121 | ATP-dependent Clp protease ATP-binding subunit ClpX    | WP_012420091.1 |
| AMUC_RS09310 | -0.233 | 3.12E-05 | gene1854 | Hypothetical protein                                   | WP_012420775.1 |
| AMUC_RS05270 | -0.233 | 0.036895 | gene1052 | Hypothetical protein                                   | WP_042447850.1 |
| AMUC_RS01860 | -0.234 | 0.003637 | gene370  | Hypothetical protein                                   | WP_012419386.1 |
| AMUC_RS07825 | -0.234 | 8.15E-06 | gene1556 | Molecular chaperone DnaJ                               | WP_012420497.1 |
| AMUC_RS11980 | -0.235 | 0.00196  | gene1178 | Prolipoprotein diacylglyceryl transferase              | WP_012420145.1 |
| AMUC_RS05565 | -0.235 | 0.01013  | gene1109 | DNA-directed RNA polymerase subunit beta'              | WP_012420081.1 |
| AMUC_RS08685 | -0.236 | 3.73E-08 | gene1729 | RNA polymerase sigma factor RpoD                       | WP_012420661.1 |
| AMUC_RS04360 | -0.237 | 6.99E-05 | gene869  | Acetolactate synthase small subunit                    | WP_012419857.1 |
| AMUC_RS01040 | -0.237 | 0.004327 | gene206  | Hypothetical protein                                   | WP_042447502.1 |
| AMUC_RS01710 | -0.239 | 0.00315  | gene339  | 30S ribosomal protein S19                              | WP_012419357.1 |
| AMUC_RS11105 | -0.239 | 0.000868 | gene2215 | Hypothetical protein                                   |                |
| AMUC_RS06735 | -0.241 | 0.018998 | gene1339 | Ribonuclease P protein component                       | WP_051729509.1 |
| AMUC_RS00860 | -0.242 | 1.24E-06 | gene171  | Saccharopine dehydrogenase                             | WP_012419207.1 |
| AMUC_RS00820 | -0.243 | 0.009361 | gene163  | Hypothetical protein                                   | WP_042447481.1 |
| AMUC_RS00545 | -0.243 | 0.001277 | gene109  | Hydroxymethylbilane synthase                           | WP_012419150.1 |
| AMUC_RS00435 | -0.244 | 0.008453 | gene87   | Hypothetical protein                                   | WP_012419134.1 |
| AMUC_RS08315 | -0.245 | 0.013804 | gene1655 | Hypothetical protein                                   | WP_012420590.1 |

|              |        |          |          |                                                         |                |
|--------------|--------|----------|----------|---------------------------------------------------------|----------------|
| AMUC_RS01580 | -0.245 | 0.01087  | gene313  | tRNA (guanine-N(7)-)-methyltransferase                  | WP_012419334.1 |
| AMUC_RS00115 | -0.245 | 0.001518 | gene22   | RNA polymerase sigma-54 factor                          | WP_042447387.1 |
| AMUC_RS11775 | -0.245 | 0.012299 | gene427  | Hypothetical protein                                    | WP_052294423.1 |
| AMUC_RS02680 | -0.247 | 0.000199 | gene534  | Fe-S cluster assembly protein SufB                      | WP_012419541.1 |
| AMUC_RS08070 | -0.248 | 6.28E-06 | gene1605 | Malonyl coa-acyl carrier protein transacylase           | WP_012420543.1 |
| AMUC_RS07930 | -0.248 | 9.14E-06 | gene1577 | Hypothetical protein                                    | WP_042448123.1 |
| AMUC_RS04565 | -0.249 | 0.010076 | gene910  | Zinc finger SWIM domain-containing protein              | WP_012419890.1 |
| AMUC_RS10540 | -0.249 | 0.00342  | gene2102 | Leucyl/phenylalanyl-tRNA--protein transferase           | WP_012421000.1 |
| AMUC_RS03820 | -0.250 | 0.000829 | gene761  | Aminotransferase                                        | WP_012419755.1 |
| AMUC_RS05550 | -0.250 | 1.05E-06 | gene1106 | Elongation factor 4                                     | WP_012420077.1 |
| AMUC_RS06885 | -0.250 | 2.56E-06 | gene1369 | DNA gyrase subunit B                                    | WP_012420325.1 |
| AMUC_RS06620 | -0.250 | 0.000107 | gene1316 | 30S ribosomal protein S9                                | WP_012420275.1 |
| AMUC_RS09675 | -0.250 | 0.038533 | gene1927 | MATE family efflux transporter                          | WP_012420845.1 |
| AMUC_RS06610 | -0.252 | 3.09E-05 | gene1314 | Translation initiation factor IF-1                      | WP_042448973.1 |
| AMUC_RS07630 | -0.252 | 0.016904 | gene1517 | Hypothetical protein                                    | WP_012420463.1 |
| AMUC_RS07520 | -0.253 | 0.02283  | gene1494 | Molecular chaperone GroEL                               | WP_042448069.1 |
| AMUC_RS07075 | -0.253 | 0.000126 | gene1407 | Hypothetical protein                                    | WP_012420362.1 |
| AMUC_RS07560 | -0.254 | 3.08E-06 | gene1502 | Polysaccharide export protein                           | WP_012420452.1 |
| AMUC_RS09160 | -0.255 | 1.43E-06 | gene1824 | Histidinol dehydrogenase                                | WP_012420747.1 |
| AMUC_RS03625 | -0.256 | 0.010527 | gene722  | Isopropylmalate isomerase                               | WP_012419719.1 |
| AMUC_RS10555 | -0.258 | 2.17E-07 | gene2105 | Glucose-6-phosphate isomerase                           | WP_012421002.1 |
| AMUC_RS03670 | -0.258 | 0.023627 | gene731  | 30S ribosomal protein S2                                | WP_012419726.1 |
| AMUC_RS00930 | -0.259 | 0.004023 | gene184  | Mammalian cell entry protein                            | WP_012419220.1 |
| AMUC_RS05410 | -0.259 | 3.01E-08 | gene1078 | Alpha-xylosidase                                        | WP_012420049.1 |
| AMUC_RS10000 | -0.260 | 0.011915 | gene1994 | Hypothetical protein                                    | WP_052294487.1 |
| AMUC_RS09365 | -0.261 | 9.44E-07 | gene1865 | Ornithine carbamoyltransferase                          | WP_012420786.1 |
| AMUC_RS00560 | -0.262 | 5.67E-05 | gene112  | GTP cyclohydrolase fole2                                | WP_012419153.1 |
| AMUC_RS02655 | -0.262 | 0.027309 | gene529  | tRNA threonylcarbamoyladenine biosynthesis protein tsaE | WP_012419536.1 |
| AMUC_RS07115 | -0.262 | 3.46E-07 | gene1415 | PEP-CTERM domain protein                                | WP_012420372.1 |
| AMUC_RS01630 | -0.263 | 0.012996 | gene323  | Hypothetical protein                                    | WP_012419343.1 |
| AMUC_RS00925 | -0.263 | 0.004546 | gene183  | Organic solvent ABC transporter ATP-binding protein     | WP_012419219.1 |
| AMUC_RS04045 | -0.263 | 6.99E-05 | gene806  | tRNA pseudouridine(55) synthase                         | WP_012419800.1 |
| AMUC_RS01970 | -0.263 | 0.008758 | gene392  | Hypothetical protein                                    | WP_012419406.1 |
| AMUC_RS07590 | -0.264 | 0.00974  | gene1508 | Hypothetical protein                                    | WP_042448074.1 |
| AMUC_RS07580 | -0.267 | 0.000338 | gene1506 | Phosphoglycerate kinase                                 | WP_012420456.1 |
| AMUC_RS02455 | -0.267 | 3.68E-05 | gene489  | GTP-binding protein YchF                                | WP_012419498.1 |
| AMUC_RS05790 | -0.267 | 7.72E-07 | gene1152 | L-aspartate oxidase                                     | WP_012420120.1 |
| AMUC_RS02210 | -0.268 | 0.000112 | gene440  | ATP-dependent dethiobiotin synthetase BioD              | WP_012419452.1 |
| AMUC_RS04350 | -0.268 | 0.001299 | gene867  | Trka-N domain-containing protein                        | WP_012419855.1 |

|              |        |          |          |                                            |                |
|--------------|--------|----------|----------|--------------------------------------------|----------------|
| AMUC_RS08260 | -0.269 | 0.003445 | gene1644 | Hypothetical protein                       | WP_052294470.1 |
| AMUC_RS06465 | -0.269 | 4.41E-06 | gene1287 | ATP-dependent DNA helicase RecG            | WP_042447962.1 |
| AMUC_RS08710 | -0.269 | 0.000145 | gene1734 | Tail-specific protease                     | WP_012420666.1 |
| AMUC_RS11735 | -0.269 | 0.0004   | gene349  | Hypothetical protein                       | WP_052294418.1 |
| AMUC_RS02430 | -0.269 | 0.002779 | gene484  | Epoxyqueuosine reductase                   | WP_012419493.1 |
| AMUC_RS08845 | -0.270 | 4.38E-06 | gene1761 | Carboxynorspermidine decarboxylase         | WP_012420691.1 |
| AMUC_RS04850 | -0.270 | 1.16E-06 | gene967  | Uroporphyrin-III C-methyltransferase       | WP_012419944.1 |
| AMUC_RS01530 | -0.275 | 0.00882  | gene303  | Histidine triad nucleotide-binding protein | WP_012419326.1 |
| AMUC_RS02115 | -0.275 | 0.000177 | gene421  | Hypothetical protein                       | WP_012419434.1 |
| AMUC_RS04860 | -0.276 | 2.65E-07 | gene969  | DNA topoisomerase III                      | WP_012419946.1 |
| AMUC_RS07985 | -0.279 | 0.001496 | gene1588 | tRNA glutamyl-Q synthetase                 | WP_012420528.1 |
| AMUC_RS04015 | -0.281 | 0.007048 | gene800  | Hypothetical protein                       | WP_042447740.1 |
| AMUC_RS04640 | -0.281 | 3.42E-05 | gene925  | Hypothetical protein                       | WP_012419905.1 |
| AMUC_RS01680 | -0.281 | 0.00585  | gene333  | 30S ribosomal protein S17                  | WP_012419351.1 |
| AMUC_RS08555 | -0.282 | 0.000502 | gene1703 | Hypothetical protein                       | WP_012420636.1 |
| AMUC_RS09325 | -0.282 | 3.17E-06 | gene1857 | Glycerol-3-phosphate cytidiltransferase    | WP_012420779.1 |
| AMUC_RS11950 | -0.283 | 0.000315 | gene1038 | RNP-1 like RNA-binding protein             | WP_012420014.1 |
| AMUC_RS00665 | -0.283 | 0.017601 | gene133  | Hypothetical protein                       | WP_042447452.1 |
| AMUC_RS09460 | -0.283 | 0.001115 | gene1884 | Hypothetical protein                       | WP_012420805.1 |
| AMUC_RS04125 | -0.283 | 0.000176 | gene822  | SLC13 family permease                      | WP_012419816.1 |
| AMUC_RS00815 | -0.285 | 3.92E-08 | gene162  | Tyrosine--tRNA ligase                      | WP_012419199.1 |
| AMUC_RS02545 | -0.285 | 0.002175 | gene507  | Hypothetical protein                       | WP_012419515.1 |
| AMUC_RS01715 | -0.285 | 0.021003 | gene340  | 50S ribosomal protein L2                   | WP_012419358.1 |
| AMUC_RS06655 | -0.286 | 9.37E-06 | gene1323 | Inositol monophosphatase                   | WP_012420282.1 |
| AMUC_RS02300 | -0.287 | 0.000427 | gene458  | 30S ribosomal protein S21                  | WP_012419469.1 |
| AMUC_RS01525 | -0.288 | 0.001012 | gene302  | Hypothetical protein                       | WP_042447540.1 |
| AMUC_RS10360 | -0.289 | 1.74E-09 | gene2067 | Adenylosuccinate lyase                     | WP_012420968.1 |
| AMUC_RS03740 | -0.289 | 4.15E-05 | gene745  | PEP-CTERM domain protein                   | WP_042447709.1 |
| AMUC_RS11270 | -0.289 | 4.53E-05 | gene2248 | Hypothetical protein                       | WP_052294494.1 |
| AMUC_RS09725 | -0.291 | 1.45E-09 | gene1937 | Glucosamine-6-phosphate deaminase          | WP_012420854.1 |
| AMUC_RS08100 | -0.291 | 0.004374 | gene1611 | Hypothetical protein                       | WP_042448135.1 |
| AMUC_RS00660 | -0.291 | 0.000951 | gene132  | Phosphoribosylaminoimidazole carboxylase   | WP_012419174.1 |
| AMUC_RS03745 | -0.291 | 6.85E-06 | gene746  | Asparagine--tRNA ligase                    | WP_042448742.1 |
| AMUC_RS03065 | -0.292 | 1.11E-08 | gene611  | Argininosuccinate synthase                 | WP_012419612.1 |
| AMUC_RS05575 | -0.293 | 4.77E-06 | gene1111 | 50S ribosomal protein L7/L12               | WP_012420083.1 |
| AMUC_RS01840 | -0.294 | 6.99E-05 | gene365  | Hypothetical protein                       | WP_012419382.1 |
| AMUC_RS07880 | -0.296 | 1.04E-08 | gene1567 | Ribose-phosphate pyrophosphokinase         | WP_012420508.1 |
| AMUC_RS00420 | -0.297 | 1.98E-05 | gene84   | Metallophosphoesterase                     | WP_042448517.1 |
| AMUC_RS06860 | -0.297 | 0.000802 | gene1364 | Aminopeptidase                             | WP_012420320.1 |
| AMUC_RS07885 | -0.298 | 8.14E-09 | gene1568 | 50S ribosomal protein L25                  | WP_012420509.1 |

|              |        |          |          |                                                             |                |
|--------------|--------|----------|----------|-------------------------------------------------------------|----------------|
| AMUC_RS04555 | -0.298 | 4.63E-06 | gene908  | Sodium-independent anion transporter                        | WP_012419888.1 |
| AMUC_RS01370 | -0.299 | 8.15E-06 | gene271  | Marr family transcriptional regulator                       | WP_012419304.1 |
| AMUC_RS02195 | -0.299 | 1.58E-06 | gene437  | Ribonuclease PH                                             | WP_042448654.1 |
| AMUC_RS06775 | -0.299 | 7.27E-05 | gene1347 | Farnesyl-diphosphate synthase                               | WP_012420304.1 |
| AMUC_RS00995 | -0.300 | 2.72E-05 | gene197  | Hypothetical protein                                        | WP_012419232.1 |
| AMUC_RS10980 | -0.300 | 2.18E-06 | gene2189 | Hypothetical protein                                        | WP_012421081.1 |
| AMUC_RS09170 | -0.301 | 1.98E-07 | gene1826 | Hypothetical protein                                        | WP_012420749.1 |
| AMUC_RS09390 | -0.302 | 1.09E-11 | gene1870 | Peptidase M20                                               | WP_042449168.1 |
| AMUC_RS01755 | -0.302 | 4.29E-08 | gene348  | 2,3-bisphosphoglycerate-independent phosphoglycerate mutase | WP_012419366.1 |
| AMUC_RS11180 | -0.302 | 0.000894 | gene2230 | Hypothetical protein                                        | WP_042448440.1 |
| AMUC_RS08300 | -0.303 | 0.000263 | gene1652 | MFS transporter                                             | WP_012420588.1 |
| AMUC_RS10205 | -0.304 | 3.5E-08  | gene2036 | DEAD/DEAH box helicase                                      | WP_012420940.1 |
| AMUC_RS09830 | -0.305 | 5.52E-05 | gene1959 | Phosphomethylpyrimidine synthase ThiC                       | WP_012420871.1 |
| AMUC_RS02715 | -0.307 | 0.026049 | gene541  | Hypothetical protein                                        | WP_012419547.1 |
| AMUC_RS11200 | -0.307 | 3.06E-06 | gene2234 | Hypothetical protein                                        | WP_042448443.1 |
| AMUC_RS04475 | -0.308 | 0.000107 | gene892  | Potassium transporter TrkH                                  | WP_042448790.1 |
| AMUC_RS07020 | -0.308 | 0.013931 | gene1396 | Phosphohydrolase                                            | WP_042448008.1 |
| AMUC_RS05260 | -0.310 | 0.002141 | gene1050 | Hypothetical protein                                        | WP_042447845.1 |
| AMUC_RS01785 | -0.312 | 1.08E-05 | gene354  | 1-deoxy-D-xylulose-5-phosphate synthase                     | WP_012419372.1 |
| AMUC_RS06075 | -0.313 | 0.033553 | gene1209 | Hypothetical protein                                        | WP_042447926.1 |
| AMUC_RS06685 | -0.313 | 5.87E-06 | gene1329 | GDP-fucose synthetase                                       | WP_012420288.1 |
| AMUC_RS11550 | -0.314 | 2.85E-09 | gene2304 | Oxidoreductase                                              | WP_012421187.1 |
| AMUC_RS10490 | -0.314 | 4.19E-07 | gene2092 | Homoserine dehydrogenase                                    | WP_012420991.1 |
| AMUC_RS09640 | -0.315 | 0.002303 | gene1920 | Aldo/keto reductase                                         | WP_012420839.1 |
| AMUC_RS02415 | -0.315 | 1.66E-08 | gene481  | 30S ribosomal protein S4                                    | WP_012419490.1 |
| AMUC_RS01480 | -0.317 | 3.15E-07 | gene293  | Hypothetical protein                                        | WP_042447535.1 |
| AMUC_RS07820 | -0.317 | 1.05E-06 | gene1555 | Nucleotide exchange factor GrpE                             | WP_012420496.1 |
| AMUC_RS03720 | -0.318 | 0.046164 | gene741  | HxLR family transcriptional regulator                       | WP_012419736.1 |
| AMUC_RS06380 | -0.319 | 1.9E-05  | gene1270 | 4-(cytidine 5'-diphospho)-2-C-methyl-D-erythritol kinase    | WP_012420235.1 |
| AMUC_RS07780 | -0.322 | 4.85E-05 | gene1547 | PEP-CTERM domain protein                                    | WP_012420488.1 |
| AMUC_RS00685 | -0.323 | 7.16E-07 | gene137  | Hypothetical protein                                        | WP_012419178.1 |
| AMUC_RS10060 | -0.324 | 0.000137 | gene2006 | Thymidylate kinase                                          | WP_012420912.1 |
| AMUC_RS02045 | -0.325 | 7.76E-08 | gene407  | Sigma-54-dependent Fis family transcriptional regulator     | WP_012419420.1 |
| AMUC_RS01035 | -0.325 | 5.52E-05 | gene205  | RDD domain-containing protein                               | WP_012419240.1 |
| AMUC_RS05635 | -0.326 | 7.6E-07  | gene1123 | Trigger factor                                              | WP_042447874.1 |
| AMUC_RS10495 | -0.329 | 3.1E-07  | gene2093 | Aspartate kinase                                            | WP_012420992.1 |
| AMUC_RS03770 | -0.329 | 0.00011  | gene751  | Hypothetical protein                                        | WP_042447712.1 |
| AMUC_RS02735 | -0.330 | 0.015013 | gene545  | Hypothetical protein                                        | WP_012419551.1 |
| AMUC_RS08335 | -0.331 | 1.64E-06 | gene1659 | RIP metalloprotease RseP                                    | WP_012420594.1 |

|              |        |          |          |                                                                                                             |                |
|--------------|--------|----------|----------|-------------------------------------------------------------------------------------------------------------|----------------|
| AMUC_RS01180 | -0.331 | 4.37E-16 | gene233  | 6-phosphofructokinase                                                                                       | WP_012419269.1 |
| AMUC_RS02085 | -0.332 | 1.79E-14 | gene415  | DNA polymerase III subunit alpha                                                                            | WP_012419428.1 |
| AMUC_RS07910 | -0.332 | 1.14E-06 | gene1573 | 30S ribosomal protein S6                                                                                    | WP_012420513.1 |
| AMUC_RS02140 | -0.333 | 0.000703 | gene426  | Maltose acetyltransferase                                                                                   |                |
| AMUC_RS01330 | -0.333 | 0.010103 | gene263  | Arsc family transcriptional regulator                                                                       | WP_012419295.1 |
| AMUC_RS08225 | -0.334 | 0.0001   | gene1637 | Hypothetical protein                                                                                        | WP_042448151.1 |
| AMUC_RS09665 | -0.335 | 0.001412 | gene1925 | Alpha-amylase                                                                                               | WP_012420844.1 |
| AMUC_RS10235 | -0.336 | 6.21E-12 | gene2042 | UDP-3-O-[3-hydroxymyristoyl] N-acetylglucosamine deacetylase                                                | WP_012420945.1 |
| AMUC_RS09025 | -0.336 | 0.000869 | gene1797 | Nucleotidyltransferase                                                                                      | WP_012420723.1 |
| AMUC_RS03985 | -0.337 | 4.98E-05 | gene794  | Phosphotyrosine protein phosphatase                                                                         | WP_012419787.1 |
| AMUC_RS05580 | -0.337 | 0.000521 | gene1112 | 50S ribosomal protein L10                                                                                   | WP_012420084.1 |
| AMUC_RS02230 | -0.338 | 5.84E-06 | gene444  | ABC transporter ATP-binding protein                                                                         | WP_012419456.1 |
| AMUC_RS00680 | -0.339 | 9.99E-08 | gene136  | Agmatine deiminase                                                                                          | WP_012419177.1 |
| AMUC_RS06335 | -0.340 | 0.007135 | gene1261 | Hypothetical protein                                                                                        | WP_052294459.1 |
| AMUC_RS07380 | -0.340 | 0.003057 | gene1467 | Dihydropteroate synthase                                                                                    | WP_012420425.1 |
| AMUC_RS06435 | -0.340 | 1.96E-08 | gene1281 | Bifunctional phosphoribosylaminoimidazolecarboxamide formyltransferase/inosine monophosphate cyclohydrolase | WP_012420246.1 |
| AMUC_RS08445 | -0.341 | 8.02E-05 | gene1681 | Hypothetical protein                                                                                        | WP_042448186.1 |
| AMUC_RS06570 | -0.341 | 0.000166 | gene1307 | Nucleoid-associated protein                                                                                 | WP_012420267.1 |
| AMUC_RS02410 | -0.344 | 1.19E-05 | gene480  | Haloacid dehalogenase                                                                                       | WP_012419489.1 |
| AMUC_RS10325 | -0.346 | 0.003208 | gene2060 | Acyltransferase                                                                                             | WP_012420962.1 |
| AMUC_RS08800 | -0.346 | 0.003338 | gene1752 | 30S ribosomal protein S20                                                                                   | WP_012420682.1 |
| AMUC_RS07980 | -0.347 | 5.27E-08 | gene1587 | TrkA-C domain-containing protein                                                                            | WP_012420527.1 |
| AMUC_RS03080 | -0.348 | 2.37E-14 | gene615  | Triose-phosphate isomerase                                                                                  | WP_012419614.1 |
| AMUC_RS08790 | -0.349 | 1.33E-10 | gene1750 | 4-hydroxy-3-methylbut-2-enyl diphosphate reductase                                                          | WP_012420681.1 |
| AMUC_RS11760 | -0.351 | 6.93E-06 | gene393  | Hypothetical protein                                                                                        | WP_012419407.1 |
| AMUC_RS00550 | -0.351 | 2.08E-06 | gene110  | Glutamyl-tRNA reductase                                                                                     | WP_012419151.1 |
| AMUC_RS08390 | -0.351 | 1.77E-05 | gene1670 | Methylated-DNA--protein-cysteine methyltransferase                                                          | WP_012420603.1 |
| AMUC_RS08705 | -0.352 | 3E-06    | gene1733 | Serine hydroxymethyltransferase                                                                             | WP_042449109.1 |
| AMUC_RS01030 | -0.353 | 7.68E-11 | gene204  | Acyl-[acyl-carrier-protein]--UDP-N-acetylglucosamine O-acyltransferase                                      | WP_012419239.1 |
| AMUC_RS08650 | -0.353 | 0.005988 | gene1722 | Outer membrane autotransporter barrel domain-containing protein                                             | WP_012420655.1 |
| AMUC_RS04470 | -0.354 | 0.00161  | gene891  | Potassium-transporting ATPase subunit A                                                                     | WP_012419878.1 |
| AMUC_RS10160 | -0.355 | 4.56E-05 | gene2027 | Hypothetical protein                                                                                        | WP_012420931.1 |
| AMUC_RS10090 | -0.355 | 1.41E-08 | gene2012 | UDP-diphosphatase                                                                                           | WP_012420918.1 |

|              |        |          |          |                                                                                 |                |
|--------------|--------|----------|----------|---------------------------------------------------------------------------------|----------------|
| AMUC_RS02290 | -0.355 | 7.48E-10 | gene456  | Bifunctional heptose 7-phosphate kinase/heptose 1-phosphate adenylyltransferase | WP_012419468.1 |
| AMUC_RS04455 | -0.356 | 3.66E-09 | gene888  | Two-component sensor histidine kinase                                           | WP_012419875.1 |
| AMUC_RS05875 | -0.357 | 4.44E-07 | gene1169 | Heavy metal translocating P-type ATPase                                         | WP_012420136.1 |
| AMUC_RS01535 | -0.359 | 1.41E-08 | gene304  | Translation factor Sua5                                                         | WP_012419327.1 |
| AMUC_RS08190 | -0.359 | 4.57E-06 | gene1630 | Anthranilate synthase                                                           | WP_042448145.1 |
| AMUC_RS11110 | -0.361 | 1.74E-10 | gene2216 | Glycosyl transferase                                                            | WP_012421104.1 |
| AMUC_RS02640 | -0.361 | 2.13E-10 | gene526  | Alpha-1%2C3-galactosidase                                                       | WP_012419533.1 |
| AMUC_RS06080 | -0.362 | 0.009792 | gene1210 | Hypothetical protein                                                            | WP_012420178.1 |
| AMUC_RS10465 | -0.363 | 1.31E-09 | gene2088 | Methionine synthase                                                             | WP_012420988.1 |
| AMUC_RS11265 | -0.364 | 9.98E-09 | gene2247 | Orotate phosphoribosyltransferase                                               | WP_012421133.1 |
| AMUC_RS07280 | -0.366 | 5.77E-05 | gene1447 | Hypothetical protein                                                            | WP_042448029.1 |
| AMUC_RS08285 | -0.367 | 0.000176 | gene1649 | Hypothetical protein                                                            |                |
| AMUC_RS06560 | -0.367 | 1.81E-11 | gene1305 | Hypothetical protein                                                            | WP_052294500.1 |
| AMUC_RS05750 | -0.367 | 9.08E-05 | gene1146 | Hypothetical protein                                                            | WP_042447893.1 |
| AMUC_RS00780 | -0.368 | 4.65E-06 | gene155  | Chromosome partitioning protein ParB                                            | WP_012419192.1 |
| AMUC_RS04000 | -0.369 | 7.15E-05 | gene797  | Maltose acetyltransferase                                                       | WP_031930480.1 |
| AMUC_RS10215 | -0.369 | 7.39E-12 | gene2038 | Type I restriction-modification protein subunit M                               | WP_012420942.1 |
| AMUC_RS02395 | -0.370 | 1.23E-05 | gene477  | Hypothetical protein                                                            | WP_012419486.1 |
| AMUC_RS02095 | -0.370 | 0.001581 | gene417  | Thiamine phosphate synthase                                                     | WP_052294422.1 |
| AMUC_RS12180 | -0.371 | 2.03E-06 | gene2037 | Restriction modification system DNA specificity domain                          | WP_012420941.1 |
| AMUC_RS06550 | -0.372 | 1.44E-12 | gene1303 | Orotidine 5'-phosphate decarboxylase                                            | WP_012420263.1 |
| AMUC_RS07405 | -0.376 | 0.000813 | gene1472 | Hypothetical protein                                                            | WP_012420429.1 |
| AMUC_RS03950 | -0.376 | 9.3E-12  | gene787  | GTPase ObgE                                                                     | WP_022197812.1 |
| AMUC_RS07575 | -0.379 | 2.15E-06 | gene1505 | Type I glyceraldehyde-3-phosphate dehydrogenase                                 | WP_012420455.1 |
| AMUC_RS10330 | -0.380 | 1.42E-09 | gene2061 | Hypothetical protein                                                            | WP_031931384.1 |
| AMUC_RS05960 | -0.383 | 1.94E-07 | gene1186 | Dihydroxy-acid dehydratase                                                      | WP_012420152.1 |
| AMUC_RS09605 | -0.384 | 0.010281 | gene1913 | 2%2C5-diketo-D-gluconic acid reductase                                          | WP_012420832.1 |
| AMUC_RS07570 | -0.384 | 1.86E-09 | gene1504 | Holliday junction ATP-dependent DNA helicase RuvA                               | WP_042449043.1 |
| AMUC_RS12150 | -0.385 | 7.43E-10 | gene1960 | Thioredoxin domain                                                              | WP_012420872.1 |
| AMUC_RS09920 | -0.385 | 5.56E-10 | gene1978 | Metallophosphoesterase                                                          | WP_012420884.1 |
| AMUC_RS04930 | -0.386 | 2.58E-07 | gene983  | ATP--cobalamin adenosyltransferase                                              | WP_012419960.1 |
| AMUC_RS07760 | -0.387 | 9.81E-06 | gene1543 | N-acetyl-gamma-glutamyl-phosphate reductase                                     | WP_012420484.1 |
| AMUC_RS07270 | -0.389 | 3.46E-07 | gene1445 | Hypothetical protein                                                            | WP_012420404.1 |
| AMUC_RS01635 | -0.391 | 1.52E-06 | gene324  | MotA/TolQ/ExbB proton channel                                                   | WP_012419344.1 |
| AMUC_RS06290 | -0.391 | 1.97E-05 | gene1252 | Ketol-acid reductoisomerase                                                     | WP_012420218.1 |

|              |        |          |          |                                                                       |                |
|--------------|--------|----------|----------|-----------------------------------------------------------------------|----------------|
| AMUC_RS05350 | -0.394 | 9.1E-14  | gene1067 | ABC transporter ATP-binding protein                                   | WP_012420039.1 |
| AMUC_RS10435 | -0.395 | 0.015431 | gene2082 | Aminoacyl-tRNA deacylase                                              | WP_012420983.1 |
| AMUC_RS02005 | -0.398 | 2.58E-10 | gene399  | Hypothetical protein                                                  | WP_012419413.1 |
| AMUC_RS08850 | -0.398 | 1.68E-14 | gene1762 | Arginine decarboxylase                                                | WP_012420692.1 |
| AMUC_RS07365 | -0.398 | 1.3E-18  | gene1464 | Alanine--tRNA ligase                                                  | WP_012420422.1 |
| AMUC_RS07455 | -0.399 | 3.24E-12 | gene1482 | Histidine--tRNA ligase                                                | WP_012420436.1 |
| AMUC_RS02335 | -0.401 | 4.53E-15 | gene465  | Glutamine--tRNA ligase                                                | WP_012419474.1 |
| AMUC_RS09610 | -0.402 | 0.009555 | gene1914 | Alpha/beta hydrolase                                                  | WP_012420833.1 |
| AMUC_RS10790 | -0.404 | 0.001554 | gene2152 | Crossover junction endodeoxyribonuclease ruvc                         | WP_012421048.1 |
| AMUC_RS04610 | -0.404 | 6.09E-05 | gene919  | Hypothetical protein                                                  | WP_012419899.1 |
| AMUC_RS10035 | -0.405 | 1.11E-09 | gene2001 | Isocitrate dehydrogenase (NADP(+))                                    | WP_012420908.1 |
| AMUC_RS08410 | -0.408 | 6.67E-07 | gene1674 | tRNA threonylcarbamoyladenine biosynthesis protein tsab               | WP_042448182.1 |
| AMUC_RS05355 | -0.410 | 3.66E-09 | gene1068 | Hypothetical protein                                                  | WP_012420040.1 |
| AMUC_RS02930 | -0.412 | 6.07E-14 | gene584  | Phosphoribosylformylglycinamide synthase                              | WP_012419588.1 |
| AMUC_RS08425 | -0.413 | 4.46E-07 | gene1677 | Helicase                                                              | WP_012420610.1 |
| AMUC_RS09530 | -0.414 | 3.09E-11 | gene1898 | Hypothetical protein                                                  | WP_042448288.1 |
| AMUC_RS07415 | -0.414 | 7.33E-09 | gene1474 | Hypothetical protein                                                  | WP_042448050.1 |
| AMUC_RS04100 | -0.416 | 8.78E-05 | gene817  | Hypothetical protein                                                  | WP_012419811.1 |
| AMUC_RS05020 | -0.416 | 6.77E-07 | gene1002 | 30S ribosomal protein S5                                              | WP_031930630.1 |
| AMUC_RS05610 | -0.417 | 2.11E-07 | gene1118 | Elongation factor Tu                                                  | WP_012420089.1 |
| AMUC_RS09595 | -0.419 | 0.005923 | gene1911 | Cystathionine beta-lyase                                              | WP_012420830.1 |
| AMUC_RS02920 | -0.421 | 7.57E-08 | gene582  | Hypothetical protein                                                  | WP_012419586.1 |
| AMUC_RS06095 | -0.422 | 1.21E-05 | gene1213 | Hypothetical protein                                                  | WP_012420181.1 |
| AMUC_RS07745 | -0.423 | 0.002495 | gene1540 | Peptide ABC transporter ATP-binding protein                           | WP_042449053.1 |
| AMUC_RS11730 | -0.425 | 0.010168 | gene325  | Hypothetical protein                                                  | WP_052294417.1 |
| AMUC_RS02585 | -0.428 | 1.77E-07 | gene515  | Hypothetical protein                                                  | WP_052294426.1 |
| AMUC_RS09400 | -0.429 | 1.07E-07 | gene1872 | 5-formyltetrahydrofolate cyclo-ligase                                 | WP_012420793.1 |
| AMUC_RS07450 | -0.431 | 6.23E-12 | gene1481 | Aspartate--tRNA ligase                                                | WP_012420435.1 |
| AMUC_RS08615 | -0.432 | 1.85E-16 | gene1715 | NADH-quinone oxidoreductase subunit D                                 | WP_012420649.1 |
| AMUC_RS05375 | -0.436 | 0.012617 | gene1072 | Short-chain dehydrogenase                                             | WP_012420043.1 |
| AMUC_RS11510 | -0.439 | 8.36E-14 | gene2296 | NADH (or F420H2) dehydrogenase                                        | WP_012421179.1 |
| AMUC_RS04755 | -0.439 | 2.27E-08 | gene948  | WecB/TagA/CpsF family glycosyl transferase                            | WP_012419927.1 |
| AMUC_RS03875 | -0.441 | 8.29E-07 | gene772  | Trna preq1(34) S-adenosylmethionine ribosyltransferase-isomerase QueA | WP_012419765.1 |
| AMUC_RS08345 | -0.441 | 1.23E-21 | gene1661 | PEP-CTERM domain protein                                              | WP_042448170.1 |
| AMUC_RS01365 | -0.443 | 4.04E-09 | gene270  | Peptide chain release factor 2                                        | WP_012419303.1 |
| AMUC_RS06875 | -0.445 | 9.74E-15 | gene1367 | Hypothetical protein                                                  | WP_042448001.1 |
| AMUC_RS01725 | -0.445 | 0.000722 | gene342  | 50S ribosomal protein L4                                              | WP_012419360.1 |
| AMUC_RS06030 | -0.445 | 1.46E-11 | gene1200 | Hypothetical protein                                                  | WP_012420168.1 |



|              |        |          |          |                                                         |                |
|--------------|--------|----------|----------|---------------------------------------------------------|----------------|
| AMUC_RS04485 | -0.447 | 4.52E-20 | gene894  | Cupin                                                   | WP_042448792.1 |
| AMUC_RS11140 | -0.449 | 1.41E-07 | gene2222 | Hypothetical protein                                    | WP_012421110.1 |
| AMUC_RS06155 | -0.453 | 0.000212 | gene1225 | Osmosensitive K channel His kinase sensor               | WP_012420194.1 |
| AMUC_RS01375 | -0.454 | 5.88E-09 | gene272  | 30S ribosomal protein S1                                | WP_012419305.1 |
| AMUC_RS04650 | -0.456 | 7.54E-12 | gene927  | Anion transporter                                       | WP_012419907.1 |
| AMUC_RS01120 | -0.456 | 1.58E-09 | gene221  | 50S ribosomal protein L19                               | WP_012419257.1 |
| AMUC_RS10785 | -0.456 | 1.55E-07 | gene2151 | Hypothetical protein                                    | WP_012421047.1 |
| AMUC_RS04490 | -0.457 | 2.56E-25 | gene895  | Marr family transcriptional regulator                   | WP_012419882.1 |
| AMUC_RS08320 | -0.458 | 1.09E-09 | gene1656 | Excinuclease ABC subunit B                              | WP_012420591.1 |
| AMUC_RS09105 | -0.458 | 2.18E-06 | gene1813 | Hypothetical protein                                    | WP_012420739.1 |
| AMUC_RS00450 | -0.459 | 2.18E-07 | gene90   | NUDIX hydrolase                                         | WP_012419136.1 |
| AMUC_RS08325 | -0.461 | 2.32E-10 | gene1657 | 50S ribosomal protein L35                               | WP_012420592.1 |
| AMUC_RS09590 | -0.462 | 0.000101 | gene1910 | Hypothetical protein                                    | WP_012420829.1 |
| AMUC_RS02080 | -0.464 | 2.97E-06 | gene414  | GNAT family acetyltransferase                           | WP_012419427.1 |
| AMUC_RS05025 | -0.466 | 1.97E-09 | gene1003 | 50S ribosomal protein L15                               | WP_012419978.1 |
| AMUC_RS09210 | -0.467 | 7.27E-12 | gene1834 | Hypothetical protein                                    | WP_042448259.1 |
| AMUC_RS11705 | -0.472 | 1.84E-09 | gene214  | Peptidase A8 signal peptidase II                        | WP_012419249.1 |
| AMUC_RS10865 | -0.474 | 9.65E-18 | gene2166 | Hypothetical protein                                    | WP_012421061.1 |
| AMUC_RS05870 | -0.474 | 7.54E-15 | gene1168 | Hypothetical protein                                    |                |
| AMUC_RS08875 | -0.475 | 0.004022 | gene1767 | Hypothetical protein                                    | WP_042448212.1 |
| AMUC_RS01720 | -0.476 | 0.000201 | gene341  | 50S ribosomal protein L23                               | WP_012419359.1 |
| AMUC_RS06135 | -0.478 | 7.38E-13 | gene1221 | Hypothetical protein                                    | WP_042447936.1 |
| AMUC_RS06430 | -0.478 | 9.12E-12 | gene1280 | 50S ribosomal protein L9                                | WP_012420245.1 |
| AMUC_RS02915 | -0.479 | 2.53E-12 | gene581  | Phosphoribosylaminoimidazolesuccinocarboxamide synthase | WP_012419585.1 |
| AMUC_RS06295 | -0.482 | 7.23E-09 | gene1253 | Hypothetical protein                                    | WP_052294499.1 |
| AMUC_RS08065 | -0.486 | 3.29E-08 | gene1604 | 50S ribosomal protein L17                               | WP_012420542.1 |
| AMUC_RS04235 | -0.486 | 6.46E-12 | gene845  | 3-isopropylmalate dehydrogenase                         | WP_012419834.1 |
| AMUC_RS10335 | -0.496 | 2.52E-05 | gene2062 | Phosphoribosyltransferase                               | WP_012420964.1 |
| AMUC_RS00410 | -0.497 | 8.07E-24 | gene82   | Tryptophan--tRNA ligase                                 | WP_012419130.1 |
| AMUC_RS02495 | -0.498 | 1.02E-24 | gene497  | Hypothetical protein                                    | WP_052294425.1 |
| AMUC_RS06305 | -0.502 | 0.000459 | gene1255 | Hypothetical protein                                    | WP_042447951.1 |
| AMUC_RS08105 | -0.507 | 2.4E-15  | gene1612 | Hypothetical protein                                    | WP_012420550.1 |
| AMUC_RS10030 | -0.508 | 0.002686 | gene2000 | Hypothetical protein                                    | WP_012420907.1 |
| AMUC_RS01340 | -0.509 | 0.036096 | gene265  | Hypothetical protein                                    | WP_042447522.1 |
| AMUC_RS03865 | -0.511 | 2.07E-07 | gene770  | Sodium/hydrogen exchanger                               | WP_012419763.1 |
| AMUC_RS05255 | -0.511 | 9.47E-05 | gene1049 | D-aminoacyl-tRNA deacylase                              | WP_012420025.1 |
| AMUC_RS00370 | -0.512 | 0.000357 | gene74   | Hypothetical protein                                    | WP_052294407.1 |
| AMUC_RS01910 | -0.513 | 1.46E-12 | gene380  | OsmC family protein                                     | WP_012419396.1 |
| AMUC_RS08550 | -0.514 | 3.6E-10  | gene1702 | Putative Fe-S cluster assembly protein SufT             | WP_012420635.1 |
| AMUC_RS07070 | -0.515 | 2.62E-11 | gene1406 | Hypothetical protein                                    | WP_052294464.1 |
| AMUC_RS02870 | -0.516 | 1.23E-20 | gene572  | Hypothetical protein                                    | WP_042447621.1 |
| AMUC_RS02745 | -0.516 | 1.46E-08 | gene547  | N-acetyltransferase GCN5                                | WP_012419553.1 |

|              |        |          |          |                                                                         |                |
|--------------|--------|----------|----------|-------------------------------------------------------------------------|----------------|
| AMUC_RS06615 | -0.517 | 6.69E-19 | gene1315 | 50S ribosomal protein L13                                               | WP_012420274.1 |
| AMUC_RS01010 | -0.517 | 5.83E-13 | gene200  | Hypothetical protein                                                    | WP_042447500.1 |
| AMUC_RS02425 | -0.517 | 1.18E-28 | gene483  | 30S ribosomal protein S13                                               | WP_012419492.1 |
| AMUC_RS06280 | -0.518 | 0.03975  | gene1250 | Lipocalin                                                               | WP_012420217.1 |
| AMUC_RS02665 | -0.528 | 1.28E-11 | gene531  | 50S ribosomal protein L27                                               | WP_012419538.1 |
| AMUC_RS07750 | -0.528 | 0.016048 | gene1541 | Amino acid ABC transporter permease                                     | WP_042449055.1 |
| AMUC_RS05590 | -0.530 | 1.9E-11  | gene1114 | 50S ribosomal protein L11                                               | WP_012420086.1 |
| AMUC_RS07480 | -0.532 | 2.58E-11 | gene1487 | Hydrogenase expression/formation protein hype                           | WP_012420441.1 |
| AMUC_RS03655 | -0.533 | 1.41E-07 | gene728  | Peptide ABC transporter ATPase                                          | WP_012419724.1 |
| AMUC_RS07470 | -0.535 | 0.009792 | gene1485 | Hydrogenase assembly protein HupF                                       | WP_012420439.1 |
| AMUC_RS01740 | -0.536 | 2.56E-06 | gene345  | Elongation factor G                                                     | WP_012419363.1 |
| AMUC_RS04035 | -0.537 | 1.14E-09 | gene804  | Aspartate decarboxylase                                                 | WP_012419798.1 |
| AMUC_RS05720 | -0.538 | 3.78E-06 | gene1140 | S-adenosylmethionine synthase                                           | WP_012420109.1 |
| AMUC_RS04005 | -0.541 | 2.3E-08  | gene798  | Phosphoglycolate phosphatase                                            | WP_012419791.1 |
| AMUC_RS08140 | -0.545 | 1.46E-18 | gene1619 | DNA methylase                                                           | WP_012420557.1 |
| AMUC_RS06195 | -0.552 | 2.28E-05 | gene1233 | Hypothetical protein                                                    | WP_052294456.1 |
| AMUC_RS02420 | -0.553 | 7.37E-15 | gene482  | 30S ribosomal protein S11                                               | WP_012419491.1 |
| AMUC_RS02285 | -0.562 | 1.2E-12  | gene455  | Phosphoheptose isomerase                                                | WP_012419467.1 |
| AMUC_RS01310 | -0.565 | 9.12E-37 | gene259  | L-threonine 3-dehydrogenase                                             | WP_012419291.1 |
| AMUC_RS03125 | -0.565 | 1.31E-08 | gene623  | Hypothetical protein                                                    | WP_012419622.1 |
| AMUC_RS01350 | -0.568 | 2.17E-13 | gene267  | Hypothetical protein                                                    | WP_042447523.1 |
| AMUC_RS10775 | -0.573 | 0.000263 | gene2149 | NUDIX domain-containing protein                                         | WP_052294492.1 |
| AMUC_RS04200 | -0.575 | 0.000106 | gene838  | Hypothetical protein                                                    | WP_052294437.1 |
| AMUC_RS05245 | -0.575 | 2.52E-16 | gene1047 | Hypothetical protein                                                    | WP_012420023.1 |
| AMUC_RS07675 | -0.577 | 0.006033 | gene1526 | Hypothetical protein                                                    | WP_012420470.1 |
| AMUC_RS04265 | -0.582 | 5.47E-18 | gene851  | Radical SAM protein                                                     | WP_012419840.1 |
| AMUC_RS09890 | -0.583 | 8.33E-27 | gene1972 | Alanine racemase                                                        | WP_042448328.1 |
| AMUC_RS03260 | -0.585 | 4.81E-10 | gene650  | Flavin reductase                                                        | WP_042448704.1 |
| AMUC_RS08145 | -0.590 | 3.01E-18 | gene1620 | Type III restriction endonuclease subunit R                             | WP_012420558.1 |
| AMUC_RS01955 | -0.593 | 2.32E-10 | gene389  | ATP-binding protein                                                     | WP_012419404.1 |
| AMUC_RS09600 | -0.593 | 6.92E-05 | gene1912 | Fe-S center ferredoxin                                                  | WP_012420831.1 |
| AMUC_RS07810 | -0.597 | 3.84E-11 | gene1553 | Phosphoribosylformimino-5-aminoimidazole carboxamide ribotide isomerase | WP_012420494.1 |
| AMUC_RS10950 | -0.598 | 1.14E-19 | gene2183 | Glutamate dehydrogenase                                                 | WP_012421075.1 |
| AMUC_RS06385 | -0.599 | 1.46E-14 | gene1271 | Hypothetical protein                                                    | WP_031930834.1 |
| AMUC_RS08060 | -0.602 | 1.2E-08  | gene1603 | DNA-directed RNA polymerase subunit alpha                               | WP_012420541.1 |
| AMUC_RS10500 | -0.604 | 7.83E-11 | gene2094 | Thioredoxin                                                             | WP_012420994.1 |
| AMUC_RS01690 | -0.604 | 1.05E-06 | gene335  | 50S ribosomal protein L16                                               | WP_012419353.1 |
| AMUC_RS07515 | -0.605 | 0.04402  | gene1493 | Molecular chaperone GroES                                               | WP_012420445.1 |
| AMUC_RS11080 | -0.614 | 3.24E-11 | gene2210 | Hypothetical protein                                                    | WP_012421098.1 |
| AMUC_RS04460 | -0.614 | 1.47E-13 | gene889  | DNA-binding response regulator                                          | WP_012419876.1 |

|              |        |          |          |                                                        |                |
|--------------|--------|----------|----------|--------------------------------------------------------|----------------|
| AMUC_RS01390 | -0.615 | 1.5E-07  | gene275  | GNAT family acetyltransferase                          | WP_012419307.1 |
| AMUC_RS01745 | -0.620 | 0.010316 | gene346  | 30S ribosomal protein S7                               | WP_012419364.1 |
| AMUC_RS11245 | -0.621 | 2.42E-16 | gene2243 | Malate dehydrogenase                                   | WP_012421129.1 |
| AMUC_RS01170 | -0.622 | 1.77E-18 | gene231  | Glucose-1-phosphate thymidyltransferase                | WP_012419267.1 |
| AMUC_RS01435 | -0.623 | 1.77E-35 | gene284  | 4-hydroxy-tetrahydrodipicolinate reductase             | WP_012419315.1 |
| AMUC_RS09465 | -0.623 | 2.25E-31 | gene1885 | Glycine--tRNA ligase                                   | WP_012420806.1 |
| AMUC_RS05015 | -0.630 | 1.05E-06 | gene1001 | 50S ribosomal protein L18                              | WP_012419976.1 |
| AMUC_RS09395 | -0.632 | 5.24E-16 | gene1871 | ABC transporter ATP-binding protein                    | WP_012420792.1 |
| AMUC_RS05010 | -0.634 | 0.002924 | gene1000 | 50S ribosomal protein L6                               | WP_012419975.1 |
| AMUC_RS10055 | -0.635 | 9.2E-22  | gene2005 | MBL fold metallo-hydrolase                             | WP_012420911.1 |
| AMUC_RS03785 | -0.638 | 4.04E-12 | gene754  | Beta-glucanase                                         | WP_012419749.1 |
| AMUC_RS02380 | -0.640 | 5.42E-19 | gene474  | CinA-like protein                                      | WP_012419483.1 |
| AMUC_RS05005 | -0.643 | 4.22E-16 | gene999  | 30S ribosomal protein S8                               | WP_012419974.1 |
| AMUC_RS06540 | -0.644 | 6.88E-15 | gene1301 | Hypothetical protein                                   | WP_042447975.1 |
| AMUC_RS09155 | -0.644 | 1.09E-09 | gene1823 | Succinyl-CoA ligase subunit beta                       | WP_012420746.1 |
| AMUC_RS06205 | -0.645 | 3.7E-11  | gene1235 | Amino acid lyase                                       | WP_012420202.1 |
| AMUC_RS00220 | -0.654 | 1.37E-07 | gene43   | N-acetyltransferase GCN5                               | WP_012419101.1 |
| AMUC_RS01735 | -0.655 | 2.19E-08 | gene344  | 30S ribosomal protein S10                              | WP_012419362.1 |
| AMUC_RS01615 | -0.655 | 3.21E-18 | gene320  | Hypothetical protein                                   | WP_012419341.1 |
| AMUC_RS03920 | -0.658 | 2.58E-30 | gene781  | GTP-binding protein                                    | WP_012419774.1 |
| AMUC_RS06690 | -0.659 | 3.27E-15 | gene1330 | GDP-mannose 4%2C6-dehydratase                          | WP_012420289.1 |
| AMUC_RS07650 | -0.661 | 6.98E-17 | gene1521 | 50S ribosomal protein L31                              | WP_035196558.1 |
| AMUC_RS10835 | -0.683 | 1.69E-21 | gene2160 | Dihydrofolate reductase                                | WP_012421055.1 |
| AMUC_RS09135 | -0.692 | 2.57E-17 | gene1819 | Recombinase RecQ                                       | WP_012420743.1 |
| AMUC_RS05795 | -0.701 | 1.23E-12 | gene1153 | 23S rRNA (guanosine(2251)-2'-O)-methyltransferase RlmB | WP_012420121.1 |
| AMUC_RS11880 | -0.704 | 1.29E-10 | gene875  | Hypothetical protein                                   | WP_052294442.1 |
| AMUC_RS02675 | -0.716 | 3.12E-25 | gene533  | Fe-S cluster assembly ATPase SufC                      | WP_035196050.1 |
| AMUC_RS05195 | -0.716 | 2.85E-13 | gene1037 | Hypothetical protein                                   | WP_051729423.1 |
| AMUC_RS02010 | -0.735 | 1.06E-48 | gene400  | Hypothetical protein                                   | WP_042447573.1 |
| AMUC_RS02670 | -0.739 | 4.76E-12 | gene532  | Transcriptional repressor                              | WP_012419539.1 |
| AMUC_RS08815 | -0.744 | 4.18E-07 | gene1755 | Secretion protein                                      | WP_012420685.1 |
| AMUC_RS01750 | -0.746 | 5.21E-12 | gene347  | 30S ribosomal protein S12                              | WP_012419365.1 |
| AMUC_RS04995 | -0.769 | 4.3E-22  | gene997  | 50S ribosomal protein L24                              | WP_012419972.1 |
| AMUC_RS00740 | -0.779 | 7.93E-22 | gene147  | Transposase                                            | WP_012419186.1 |
| AMUC_RS10155 | -0.779 | 6.39E-15 | gene2026 | Nitrogen-fixing protein NifU                           | WP_012420930.1 |
| AMUC_RS04320 | -0.784 | 0.017267 | gene861  | Cupin                                                  | WP_012419849.1 |
| AMUC_RS01360 | -0.793 | 5.73E-22 | gene269  | Trna (guanine(37)-N(1))-methyltransferase              | WP_042448603.1 |
| AMUC_RS05000 | -0.795 | 8.76E-10 | gene998  | 50S ribosomal protein L5                               | WP_012419973.1 |
| AMUC_RS06140 | -0.804 | 3.1E-07  | gene1222 | Potassium-transporting ATPase subunit KdpA             | WP_022196803.1 |
| AMUC_RS05250 | -0.807 | 7.34E-19 | gene1048 | Hypothetical protein                                   | WP_012420024.1 |

|              |        |          |          |                                                  |                |
|--------------|--------|----------|----------|--------------------------------------------------|----------------|
| AMUC_RS06035 | -0.812 | 5.83E-13 | gene1201 | Hypothetical protein                             | WP_012420169.1 |
| AMUC_RS03790 | -0.814 | 2.43E-17 | gene755  | Beta-glucanase                                   | WP_012419750.1 |
| AMUC_RS02580 | -0.834 | 1.11E-25 | gene514  | N-acetyltransferase GCN5                         | WP_012419522.1 |
| AMUC_RS01595 | -0.836 | 6.37E-15 | gene316  | Ribonuclease HIII                                | WP_042448620.1 |
| AMUC_RS09680 | -0.858 | 3.1E-11  | gene1928 | Hypothetical protein                             | WP_042448307.1 |
| AMUC_RS05935 | -0.861 | 1.41E-21 | gene1181 | ATP phosphoribosyltransferase                    | WP_012420148.1 |
| AMUC_RS08820 | -0.894 | 2.28E-38 | gene1756 | Phosphatidylserine decarboxylase                 | WP_012420686.1 |
| AMUC_RS02895 | -0.896 | 2.05E-24 | gene577  | Glutamate 5-kinase                               | WP_012419582.1 |
| AMUC_RS06355 | -0.926 | 3.22E-57 | gene1265 | Alcohol dehydrogenase                            | WP_012420230.1 |
| AMUC_RS11295 | -0.932 | 2.99E-51 | gene2253 | Threonine dehydrogenase                          | WP_012421139.1 |
| AMUC_RS09030 | -0.941 | 3.91E-22 | gene1798 | Hypothetical protein                             | WP_042448236.1 |
| AMUC_RS08450 | -0.948 | 4.78E-22 | gene1682 | Nucleoside-diphosphate kinase                    | WP_012420615.1 |
| AMUC_RS06345 | -0.957 | 7.49E-26 | gene1263 | 50S ribosomal protein L28                        | WP_012420229.1 |
| AMUC_RS02660 | -1.006 | 2.49E-23 | gene530  | 50S ribosomal protein L21                        | WP_012419537.1 |
| AMUC_RS06145 | -1.017 | 1.45E-06 | gene1223 | Potassium-transporting ATPase subunit B          | WP_012420192.1 |
| AMUC_RS09380 | -1.039 | 3E-79    | gene1868 | Phosphocarrier protein Hpr                       | WP_012420789.1 |
| AMUC_RS01260 | -1.043 | 2.12E-25 | gene249  | Hypothetical protein                             | WP_042447516.1 |
| AMUC_RS01425 | -1.051 | 1.07E-31 | gene282  | 3-methyl-2-oxobutanoate hydroxymethyltransferase | WP_012419313.1 |
| AMUC_RS09840 | -1.084 | 2.88E-50 | gene1961 | ECF subfamily RNA polymerase sigma-24 subunit    | WP_012420873.1 |
| AMUC_RS06150 | -1.095 | 3.31E-08 | gene1224 | Potassium transporter KtrB                       | WP_012420193.1 |
| AMUC_RS01355 | -1.225 | 5.07E-68 | gene268  | Hypothetical protein                             |                |
| AMUC_RS07395 | -1.303 | 3.58E-27 | gene1470 | Short-chain dehydrogenase/reductase SDR          | WP_012420428.1 |
| AMUC_RS00015 | -1.317 | 5.85E-44 | gene2    | NUDIX hydrolase                                  | WP_012419063.1 |
| AMUC_RS00360 | -1.343 | 1.18E-10 | gene72   | Membrane protein                                 | WP_042448508.1 |

Log2Fold Change = ox-bile / control condition (n = 3; the experiment was performed in triplicate).

Padj was calculated using the procedure of Benjamini and Hochberg. The upregulated and downregulated genes under ox-bile condition (padj < 0.05) were listed.
